# Supplementary material
Source: PubMed Central journal article supplement (PMC5365346)
Supplement: NIHMS846117-supplement-Supporting.pdf [file NIHMS846117-supplement-Supporting.pdf]

# Ulapualides C-E Isolated from a Hawaiian *Hexabanchus sanguineus* Egg Mass

*Stephen M. Parrish,<sup>†</sup> Wesley Yoshida,<sup>†</sup> Baojun Yang,<sup>‡</sup> and Philip G. Williams<sup>†,‡,\*</sup>*

## **Affiliation**

<sup>†</sup> Department of Chemistry, University of Hawaii at Manoa, Honolulu Hawaii, 96822.

<sup>‡</sup> University of Hawaii Cancer Center, 701 Ilalo Street, Honolulu, Hawaii, 96813.

## **Correspondence**

Prof. Dr. Philip Williams, Department of Chemistry, University of Hawaii at Manoa, Honolulu, Hawaii, USA, 96822. E-mail:

philipwi@hawaii.edu Phone: 808 956 5720 Fax: 808 956 5908

## Table of Contents

|                                                                                                                         |    |
|-------------------------------------------------------------------------------------------------------------------------|----|
| Figure S1. $^1\text{H}$ NMR Spectrum of Ulapualide C (3) ( $\text{CDCl}_3$ , 500 MHz) .....                             | 3  |
| Figure S2. $^{13}\text{C}$ NMR Spectrum of Ulapualide C (3) ( $\text{CDCl}_3$ , 125 MHz) .....                          | 4  |
| Figure S3. g HSQC Spectrum of Ulapualide C (3) ( $\text{CDCl}_3$ , 500 MHz) .....                                       | 5  |
| Figure S4. gCOSY Spectrum of Ulapualide C (3) ( $\text{CDCl}_3$ , 500 MHz) .....                                        | 6  |
| Figure S5. gHMBC Spectrum of Ulapualide C (3) ( $\text{CDCl}_3$ , 500 MHz) .....                                        | 7  |
| Figure S6. $^1\text{H}$ NMR Spectrum of Ulapualide D (4) ( $\text{CDCl}_3$ , 500 MHz) .....                             | 8  |
| Figure S7. $^{13}\text{C}$ NMR Spectrum of Ulapualide D (4) ( $\text{CDCl}_3$ , 125 MHz) .....                          | 9  |
| Figure S8. gHSQC Spectrum of Ulapualide D (4) ( $\text{CDCl}_3$ , 500 MHz) .....                                        | 10 |
| Figure S9. gCOSY Spectrum of Ulapualide D (4) ( $\text{CDCl}_3$ , 500 MHz) .....                                        | 11 |
| Figure S10. HMBC Spectrum of Ulapualide D (4) ( $\text{CDCl}_3$ , 500 MHz) .....                                        | 12 |
| Figure S11. $^1\text{H}$ NMR Spectrum of Ulapualide E (5) ( $\text{CDCl}_3$ , 500 MHz) .....                            | 13 |
| Figure S12. $^{13}\text{C}$ NMR Spectrum of Ulapualide E (5) ( $\text{CDCl}_3$ , 125 MHz) .....                         | 14 |
| Figure S13. gHSQC Spectrum of Ulapualide E (5) ( $\text{CDCl}_3$ , 500 MHz) .....                                       | 15 |
| Figure S14. gCOSY Spectrum of Ulapualide E (5) ( $\text{CDCl}_3$ , 500 MHz) .....                                       | 16 |
| Figure S15. HMBC Spectrum of Ulapualide E (5) ( $\text{CDCl}_3$ , 500 MHz) .....                                        | 17 |
| Figure S16. $^1\text{H}$ NMR Spectrum of Ulapualide A (1) ( $\text{CDCl}_3$ , 500 MHz) .....                            | 18 |
| Figure S17. $^{13}\text{C}$ NMR Spectrum of Ulapualide A (1) ( $\text{CDCl}_3$ , 125 MHz) .....                         | 19 |
| Figure S18. $^1\text{H}$ NMR Spectrum of Ulapualide B (2) ( $\text{CDCl}_3$ , 500 MHz) .....                            | 20 |
| Figure S19. $^{13}\text{C}$ NMR Spectrum of Ulapualide B (2) ( $\text{CDCl}_3$ , 125 MHz) .....                         | 21 |
| Figure S20. $\text{IC}_{50}$ Curves for Ulapualides A-C Against Select Cell Lines .....                                 | 22 |
| Figure S21. Image of <i>Hexabranchnus sanguineus</i> Egg Mass .....                                                     | 23 |
| Assay Protocols: BACE1 .....                                                                                            | 24 |
| Table S1. $^{13}\text{C}$ Chemical Shifts of Minor Rotamers of Ulapualides A-C (1-3) ( $\text{CDCl}_3$ , 125 MHz) ..... | 25 |

Figure S1. <sup>1</sup>H NMR Spectrum of Ulapualide C (3) (CDCl<sub>3</sub>, 500 MHz)

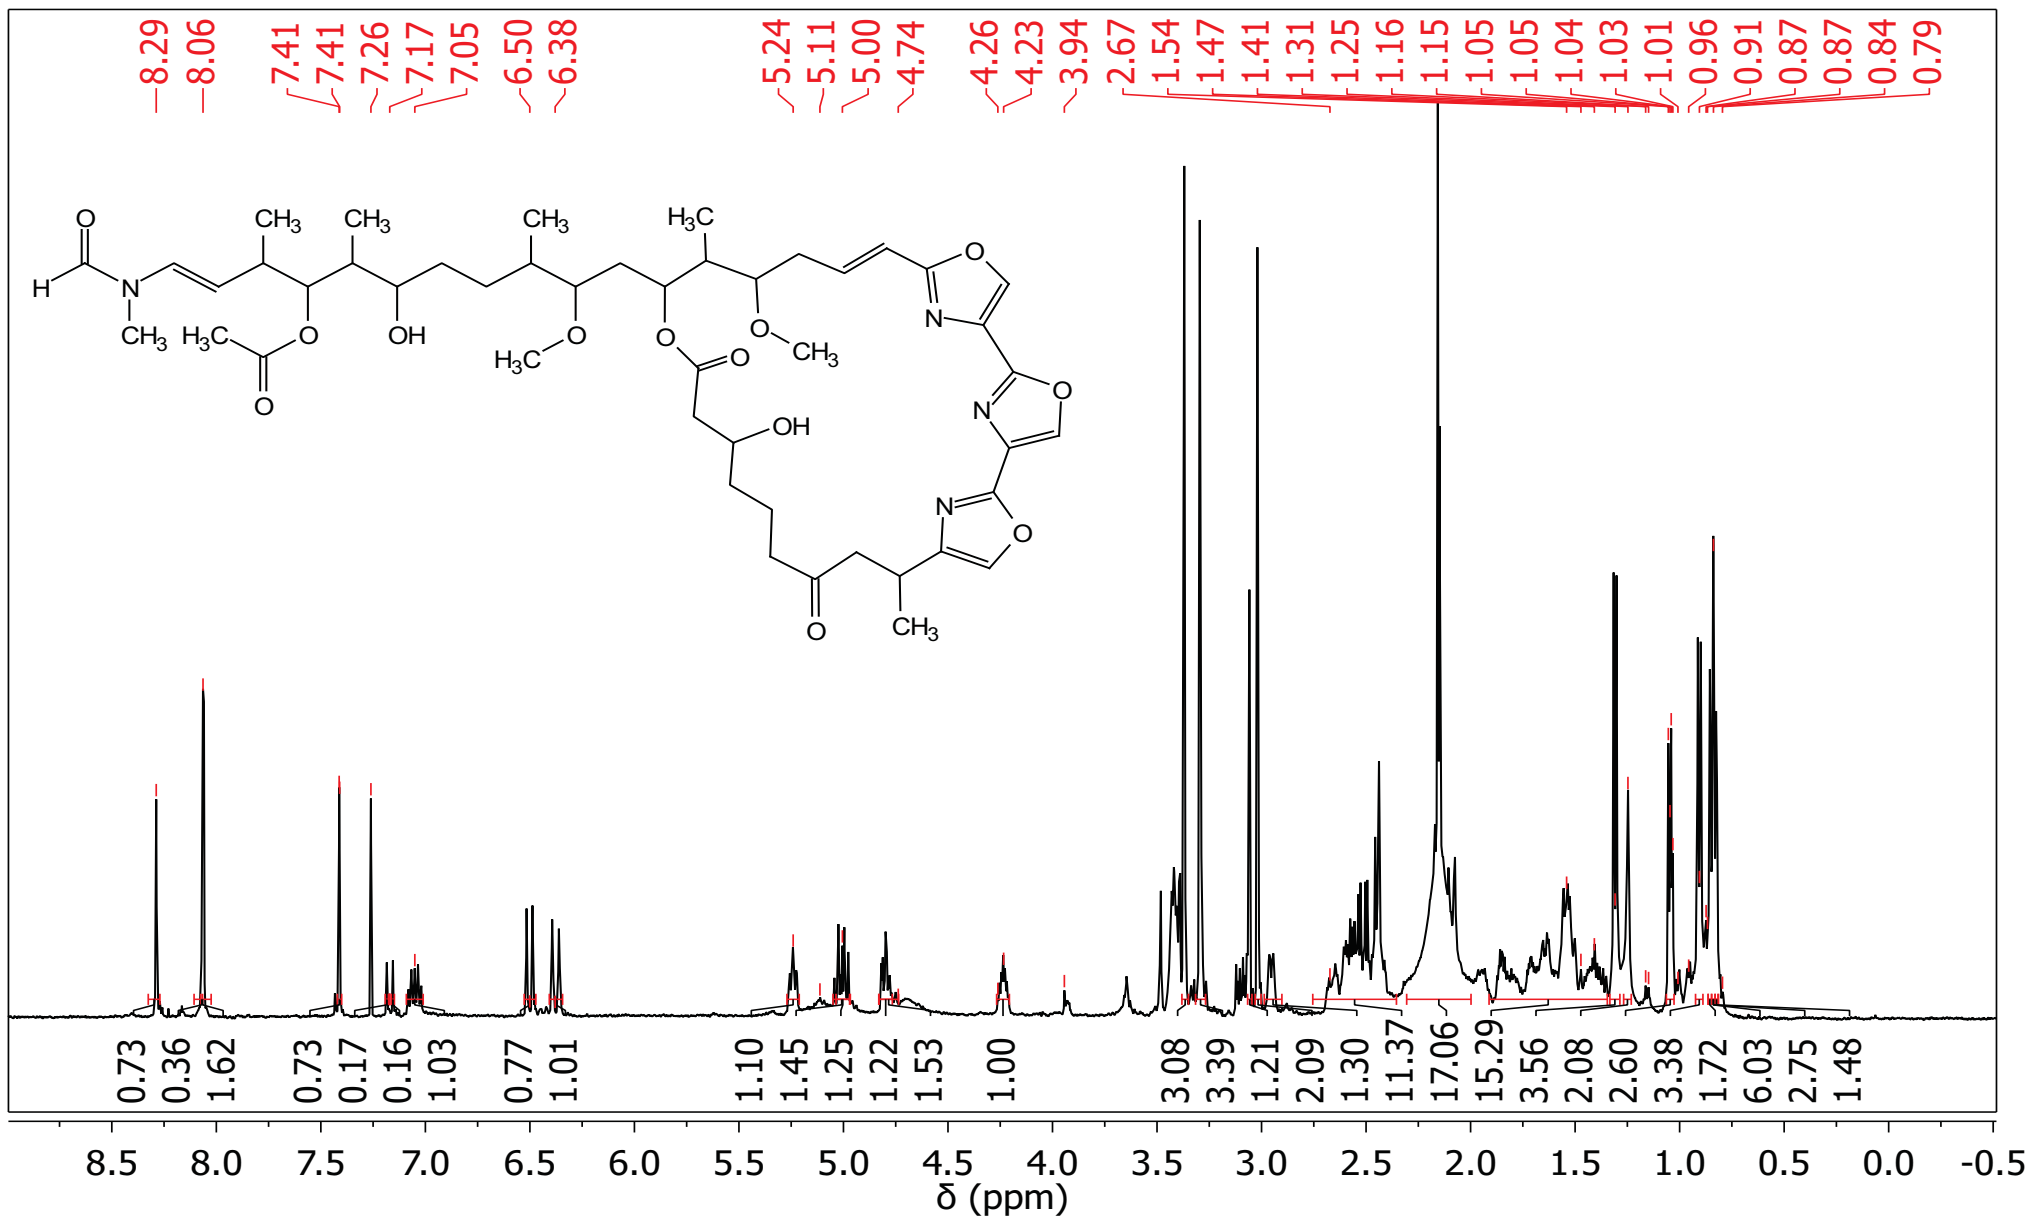

Figure S2.  $^{13}\text{C}$  NMR Spectrum of Ulapualide C (3) ( $\text{CDCl}_3$ , 125 MHz)

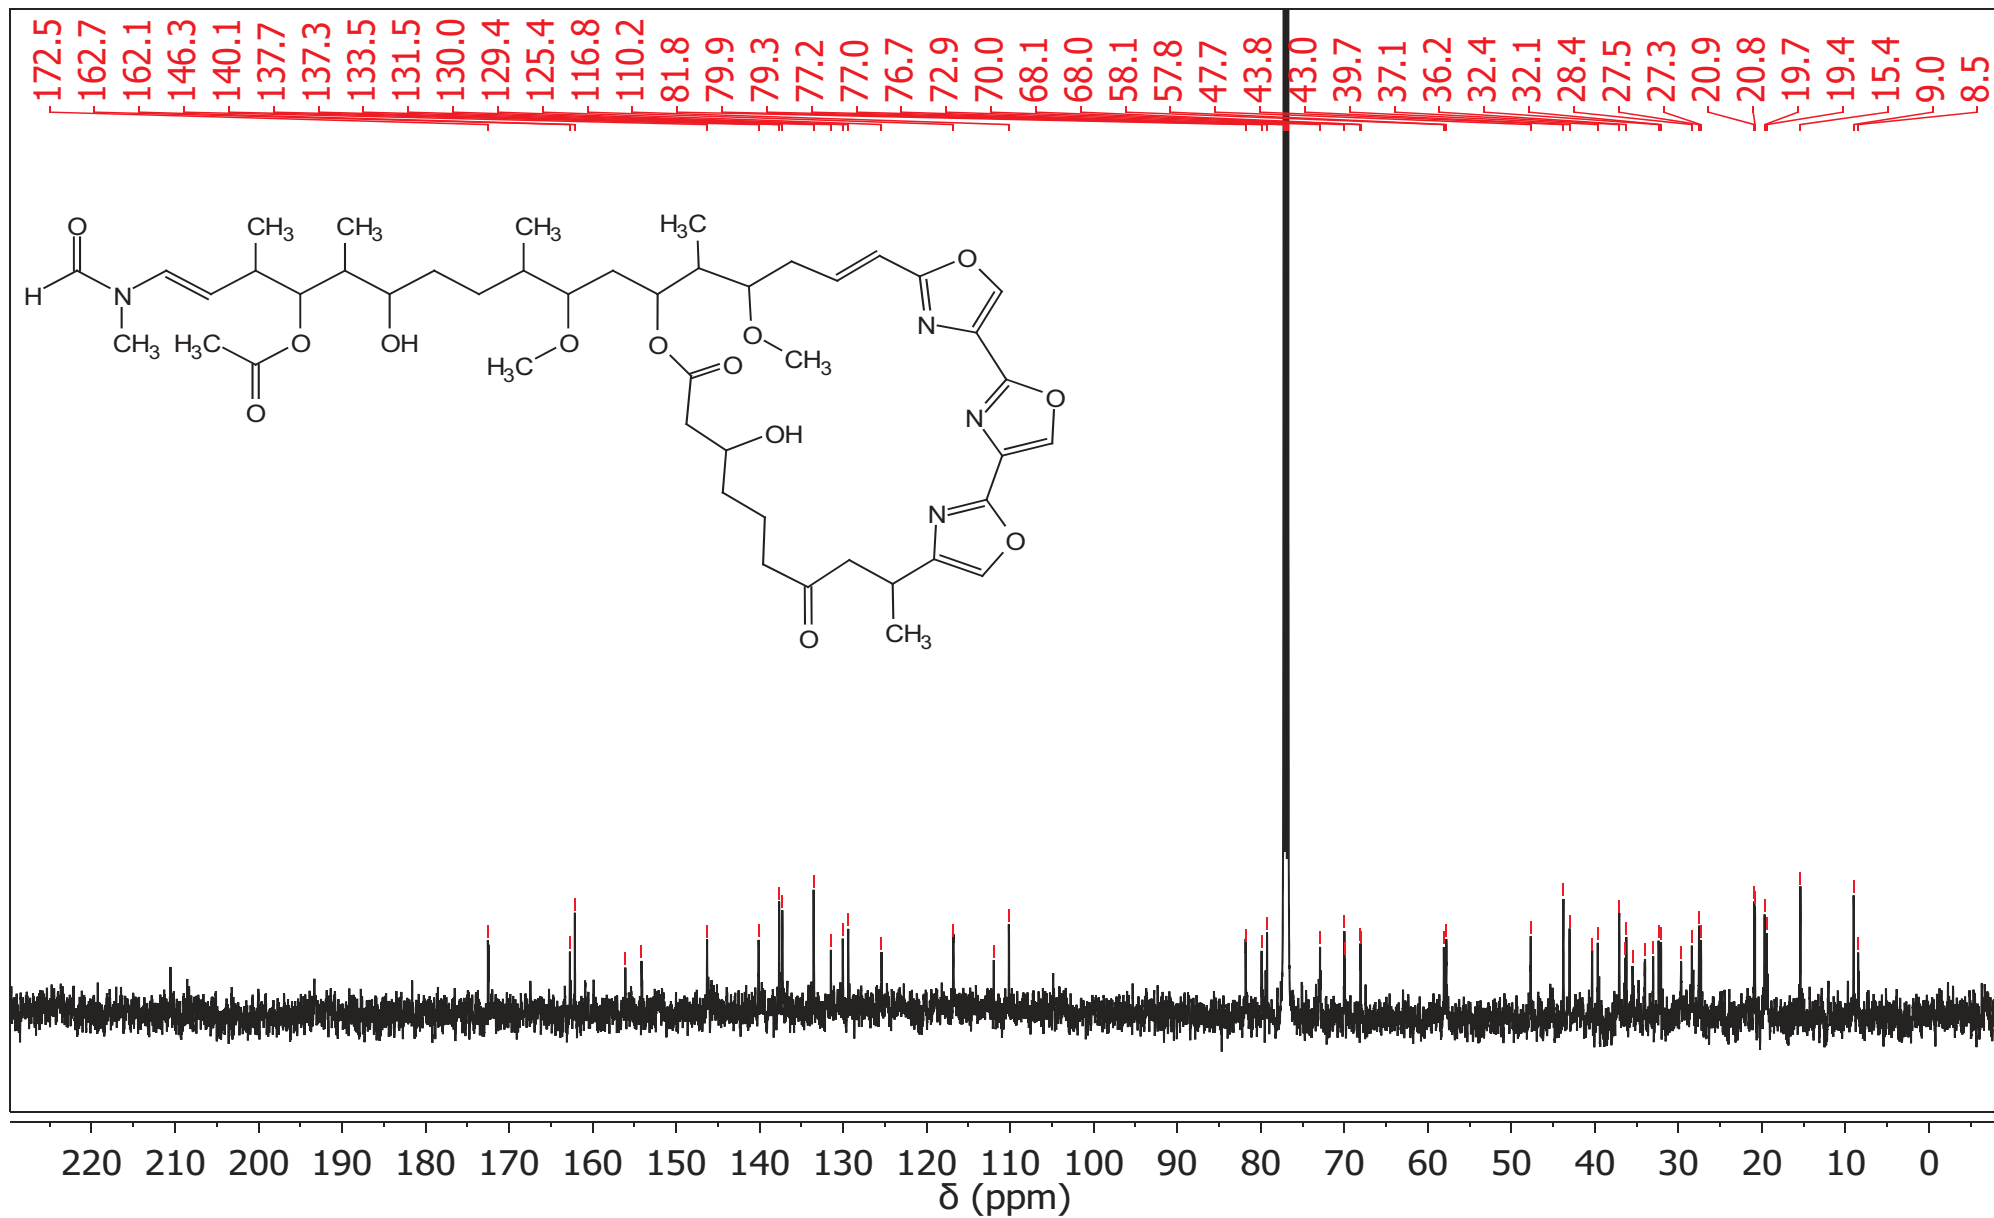

Figure S3. g HSQC Spectrum of Ulapualide C (3) (CDCl<sub>3</sub>, 500 MHz)

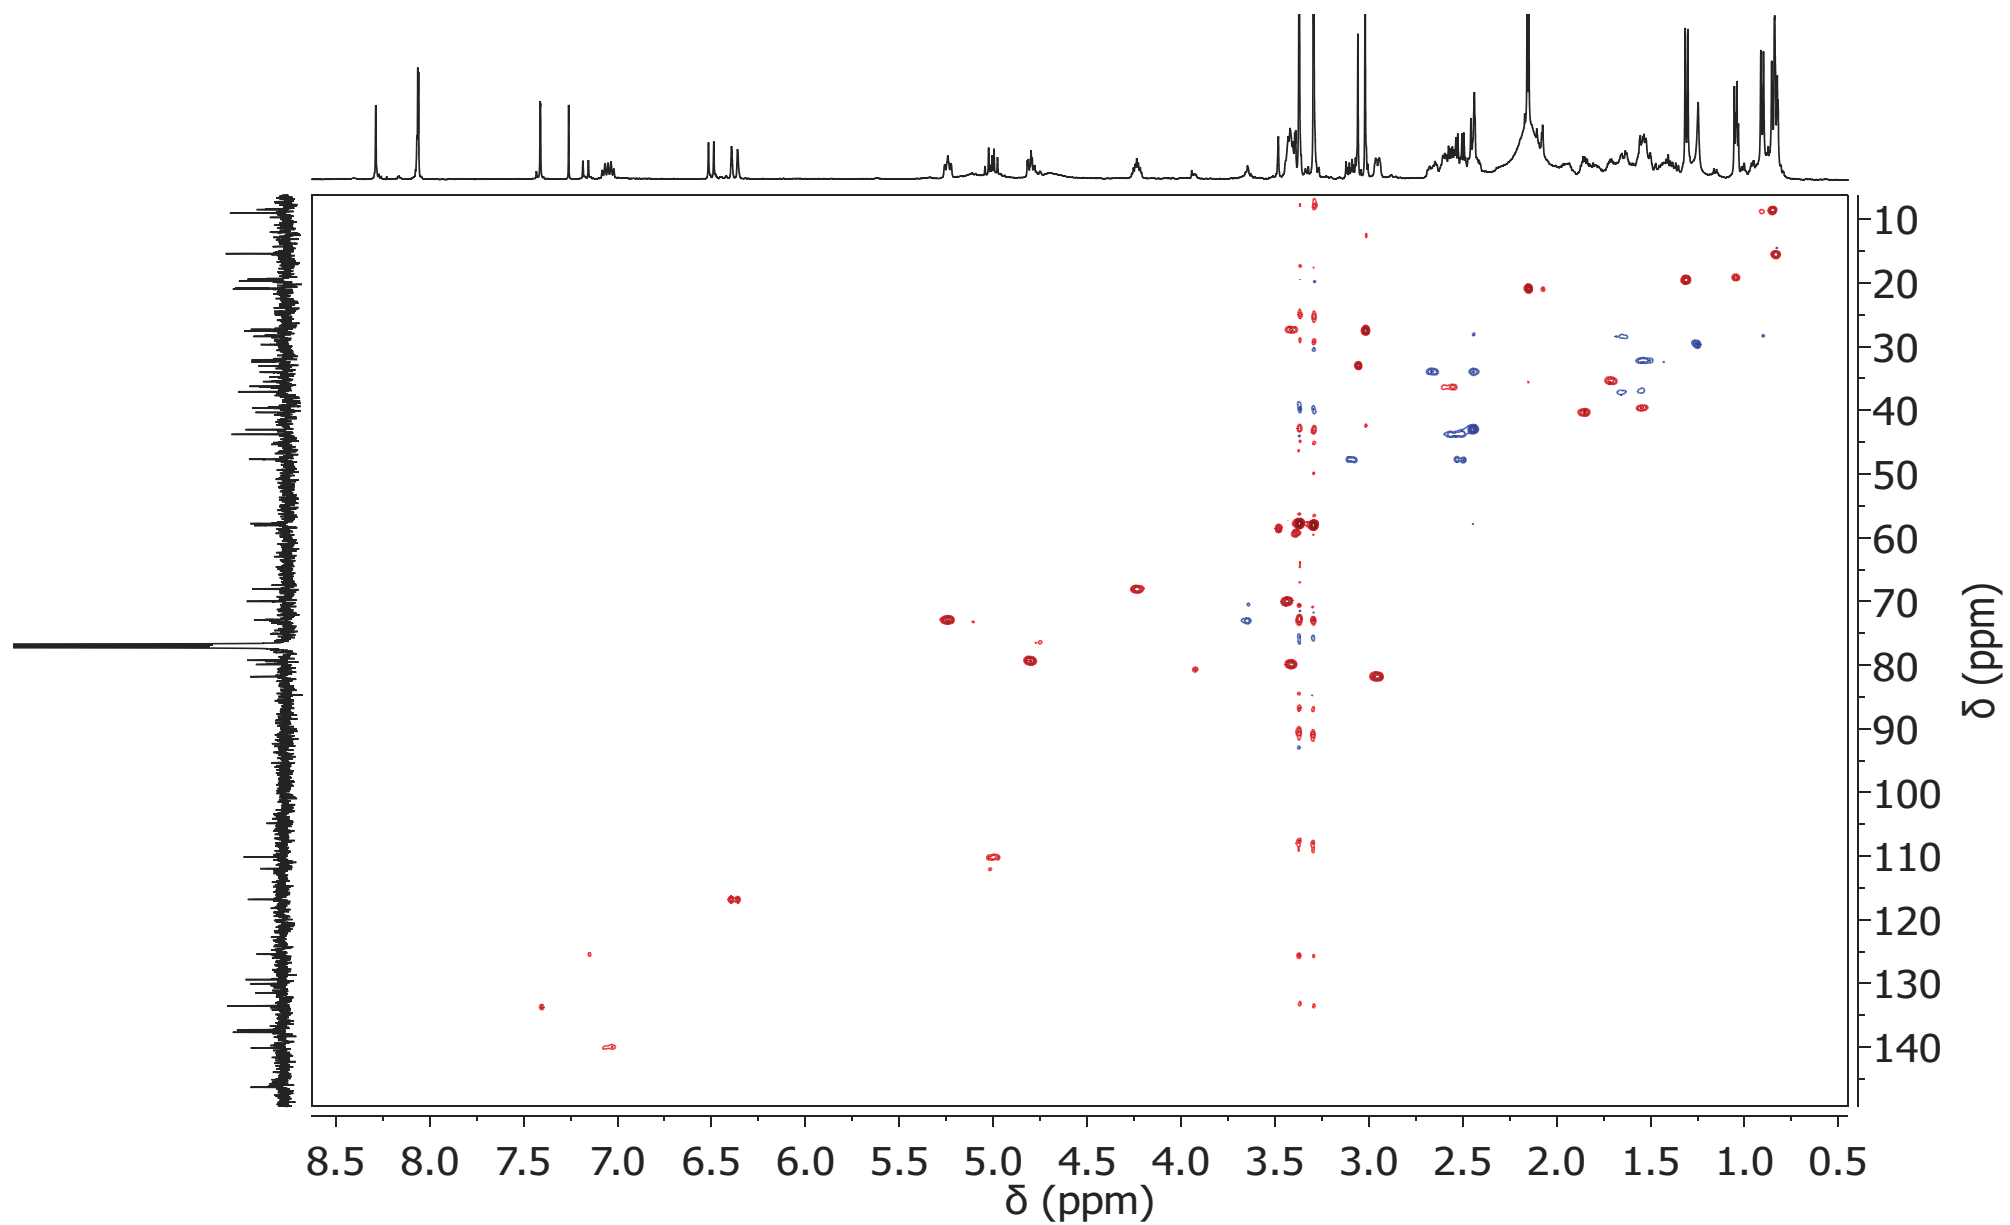

Figure S4. gCOSY Spectrum of Ulapualide C (3) (CDCl<sub>3</sub>, 500 MHz)

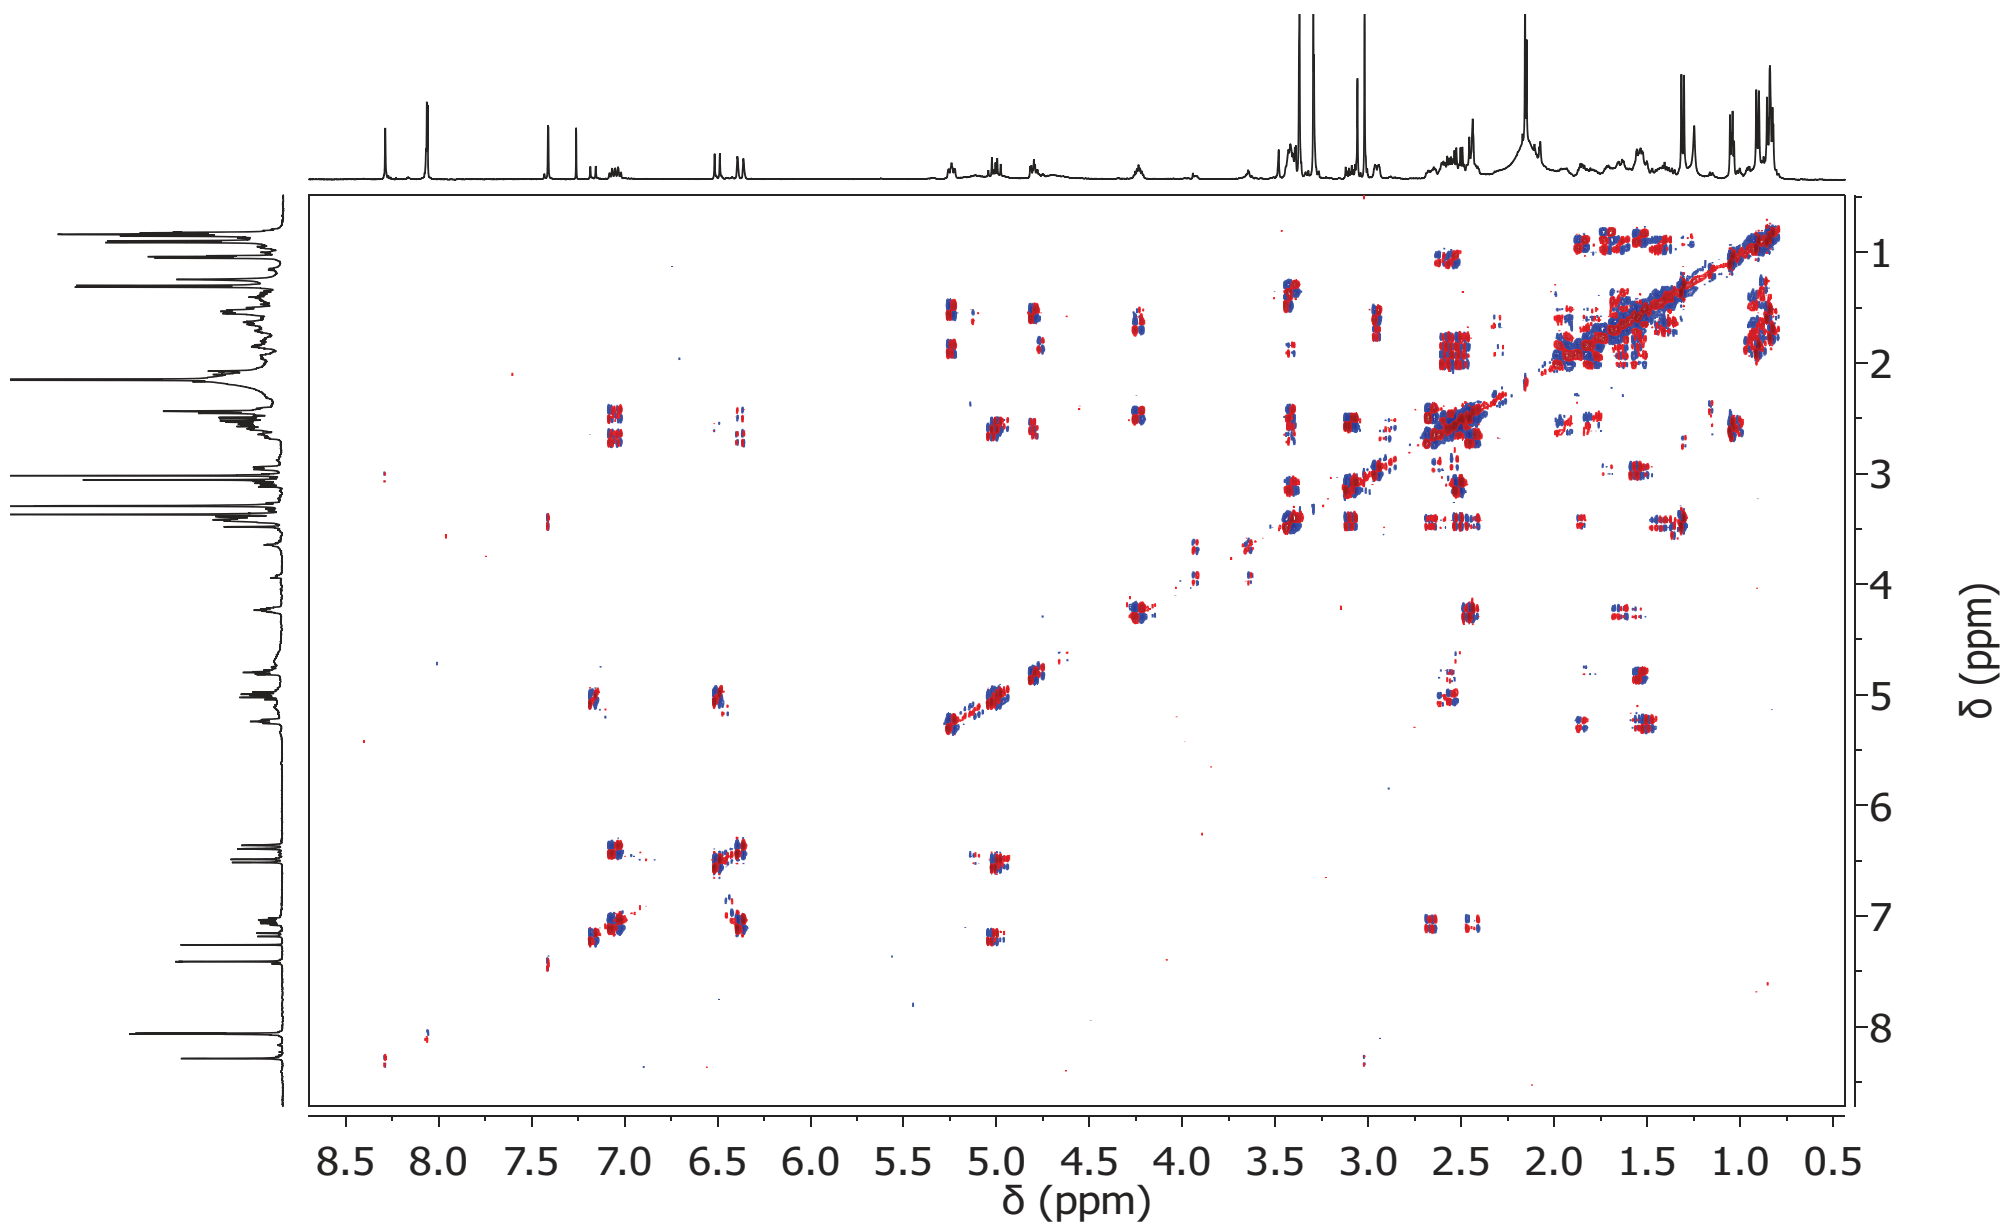

Figure S5. gHMBC Spectrum of Ulapualide C (3) (CDCl<sub>3</sub>, 500 MHz)

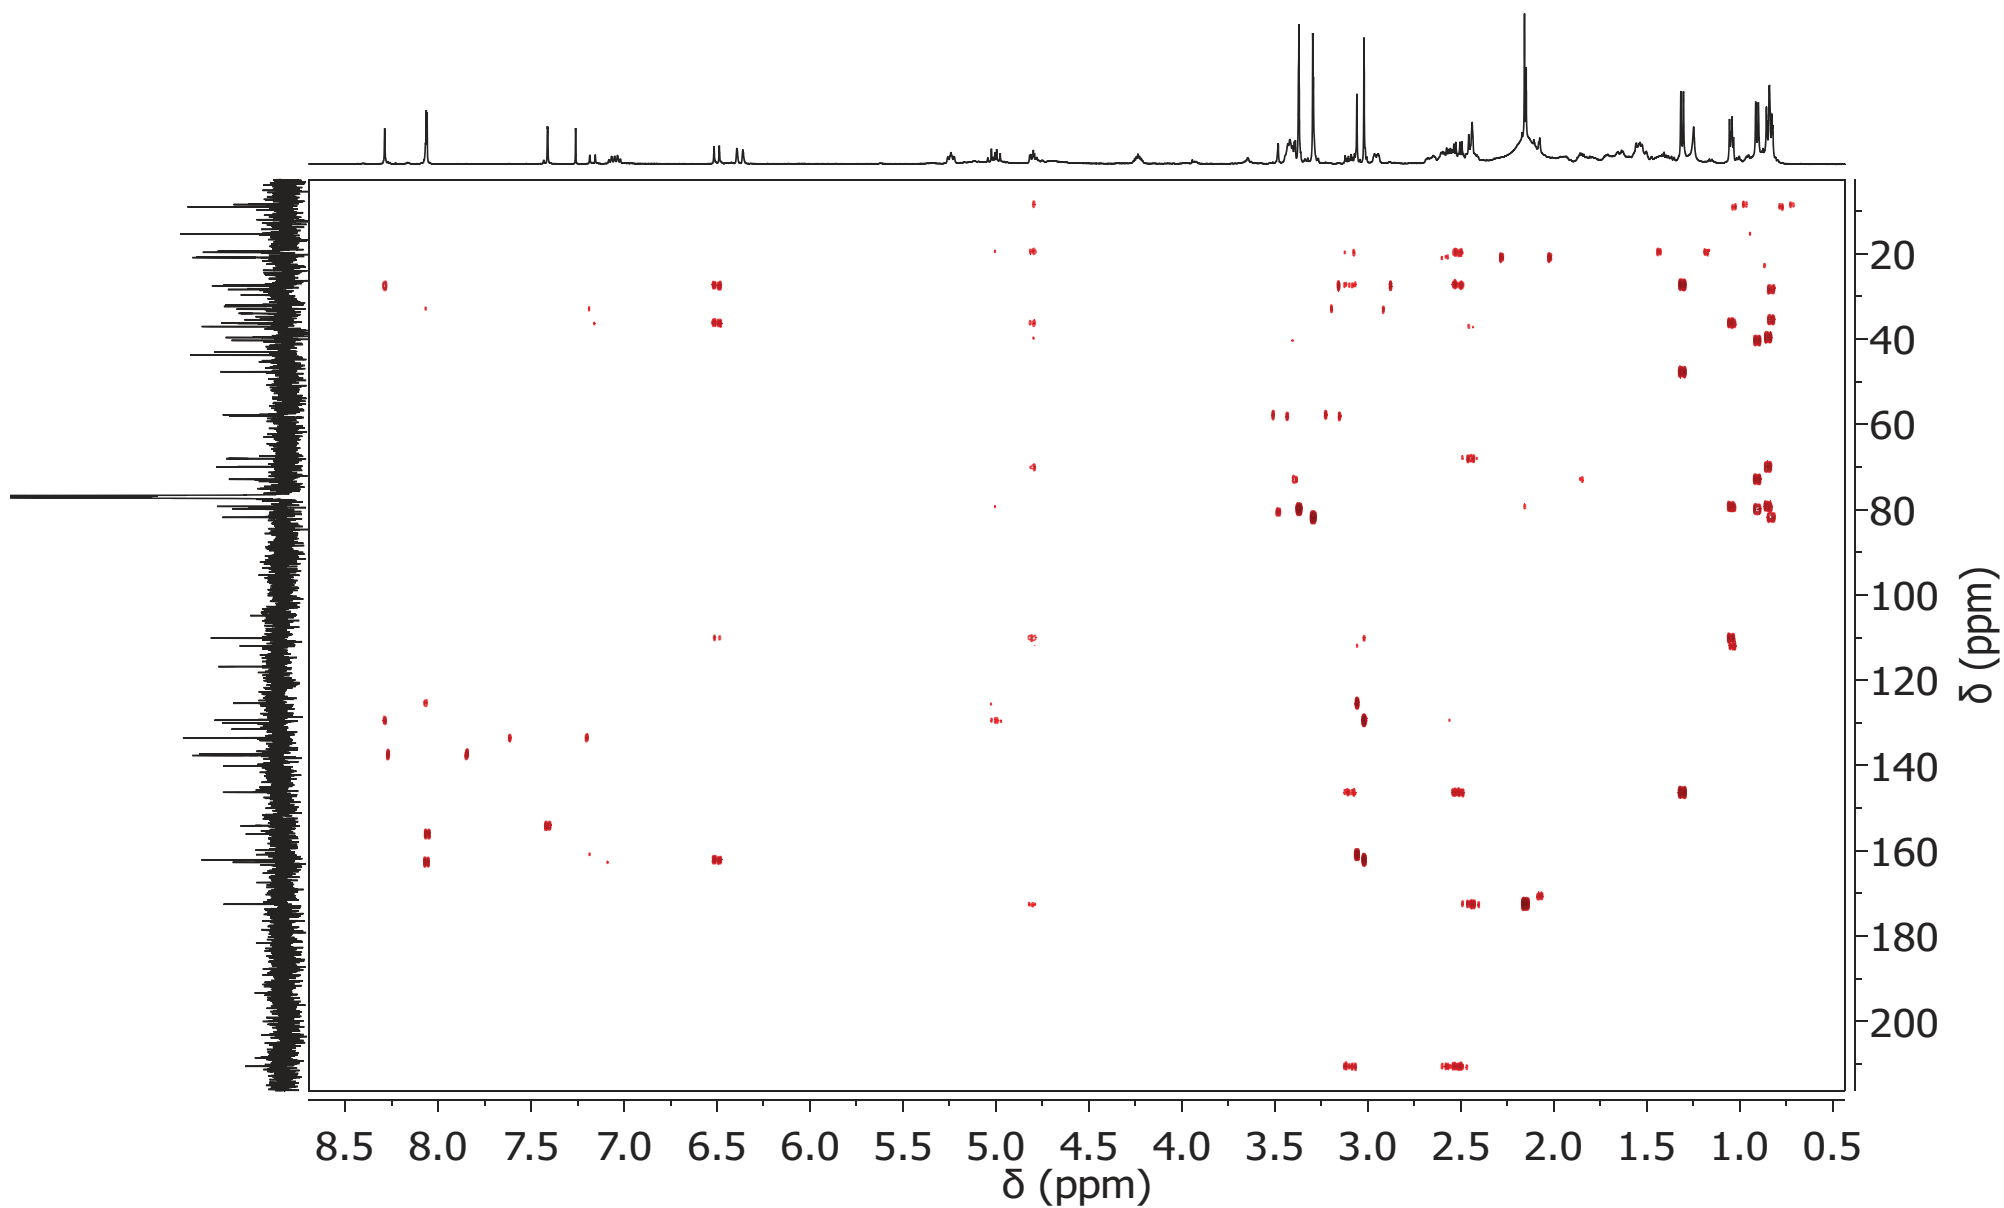

Figure S6. <sup>1</sup>H NMR Spectrum of Ulapualide D (4) (CDCl<sub>3</sub>, 500 MHz)

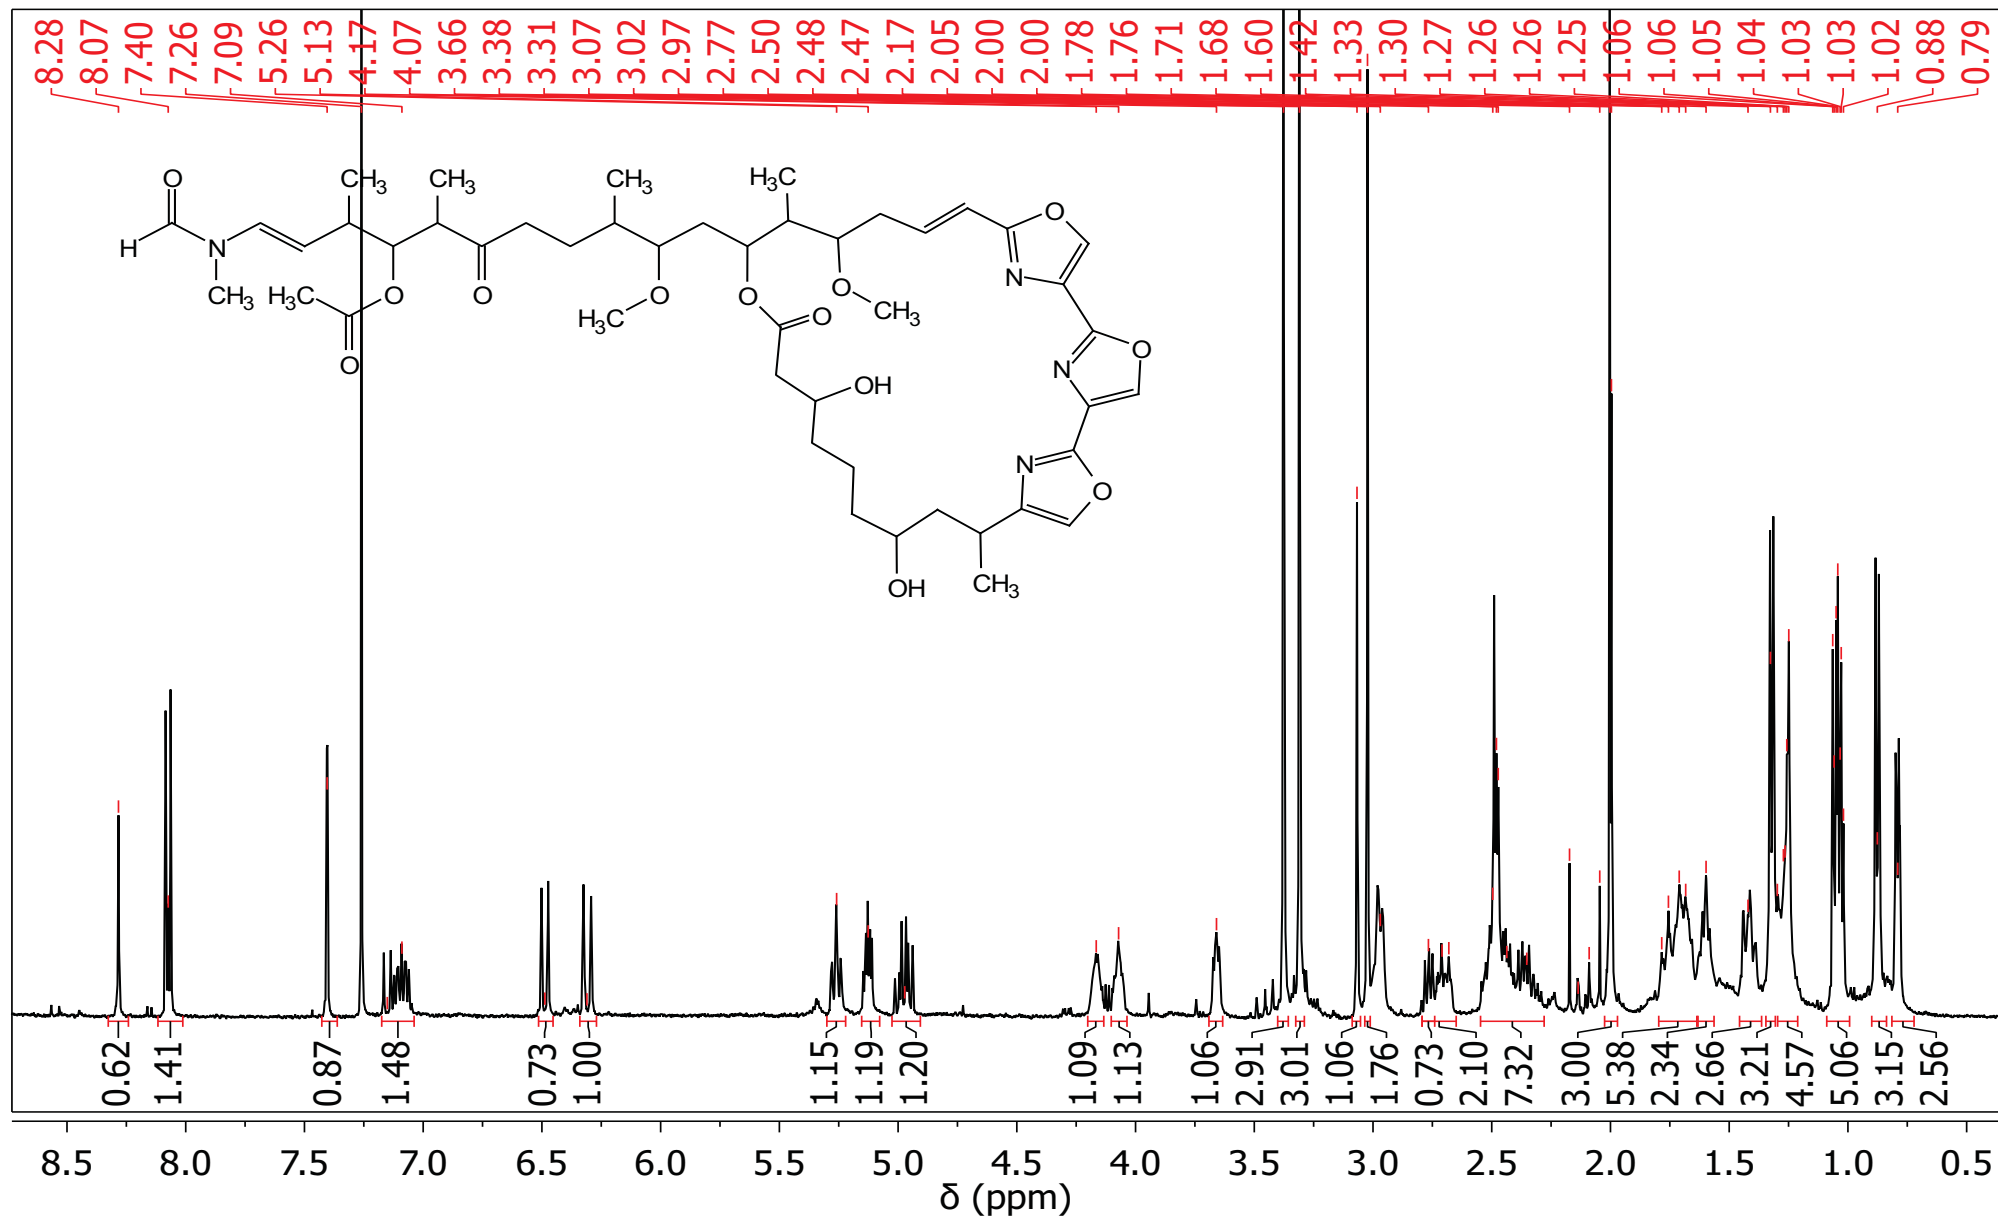



Figure S7.  $^{13}\text{C}$  NMR Spectrum of Ulapualide D (4) ( $\text{CDCl}_3$ , 125 MHz)

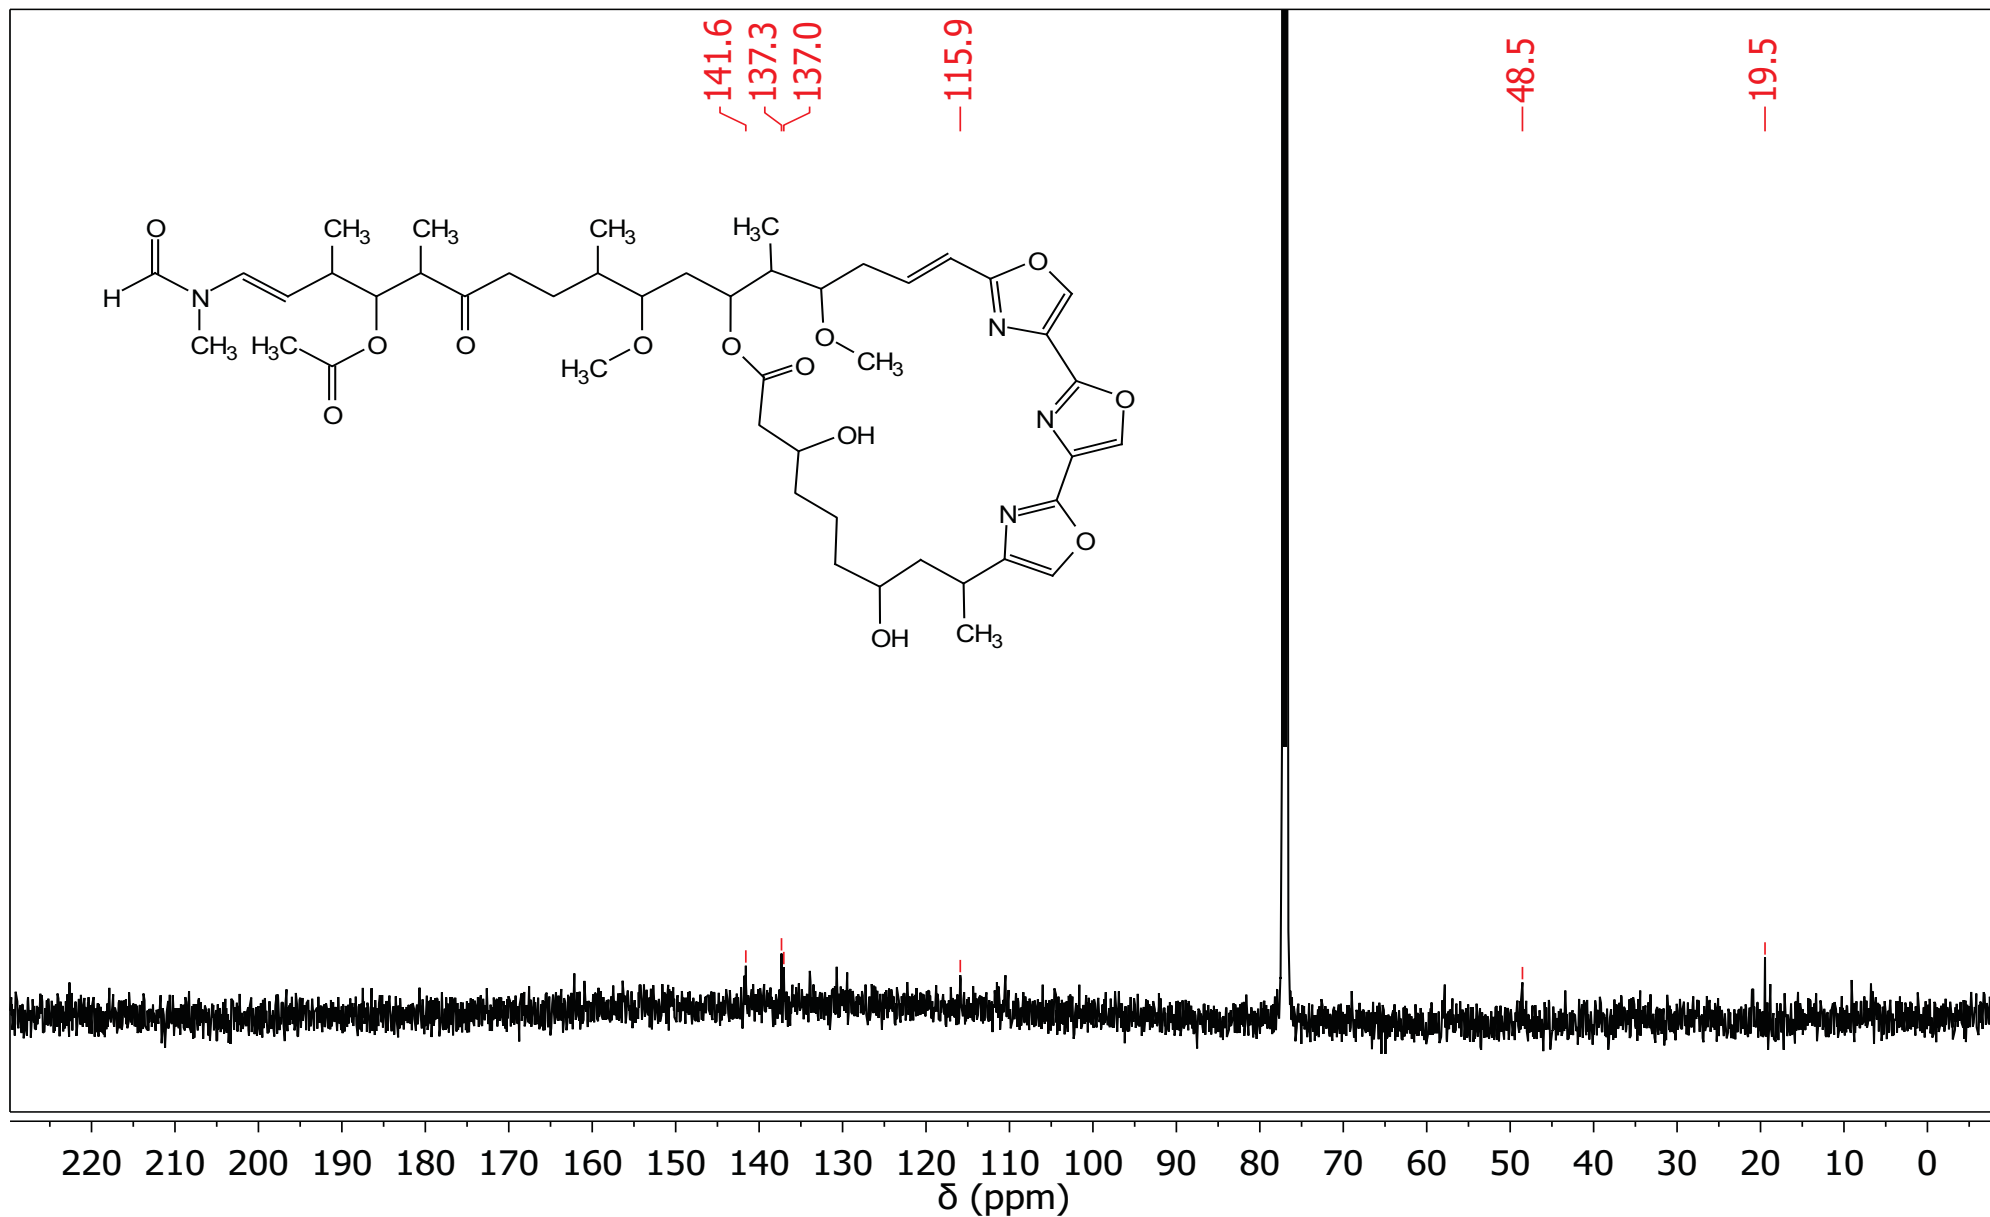

Figure S8. gHSQC Spectrum of Ulapualide D (4) (CDCl<sub>3</sub>, 500 MHz)

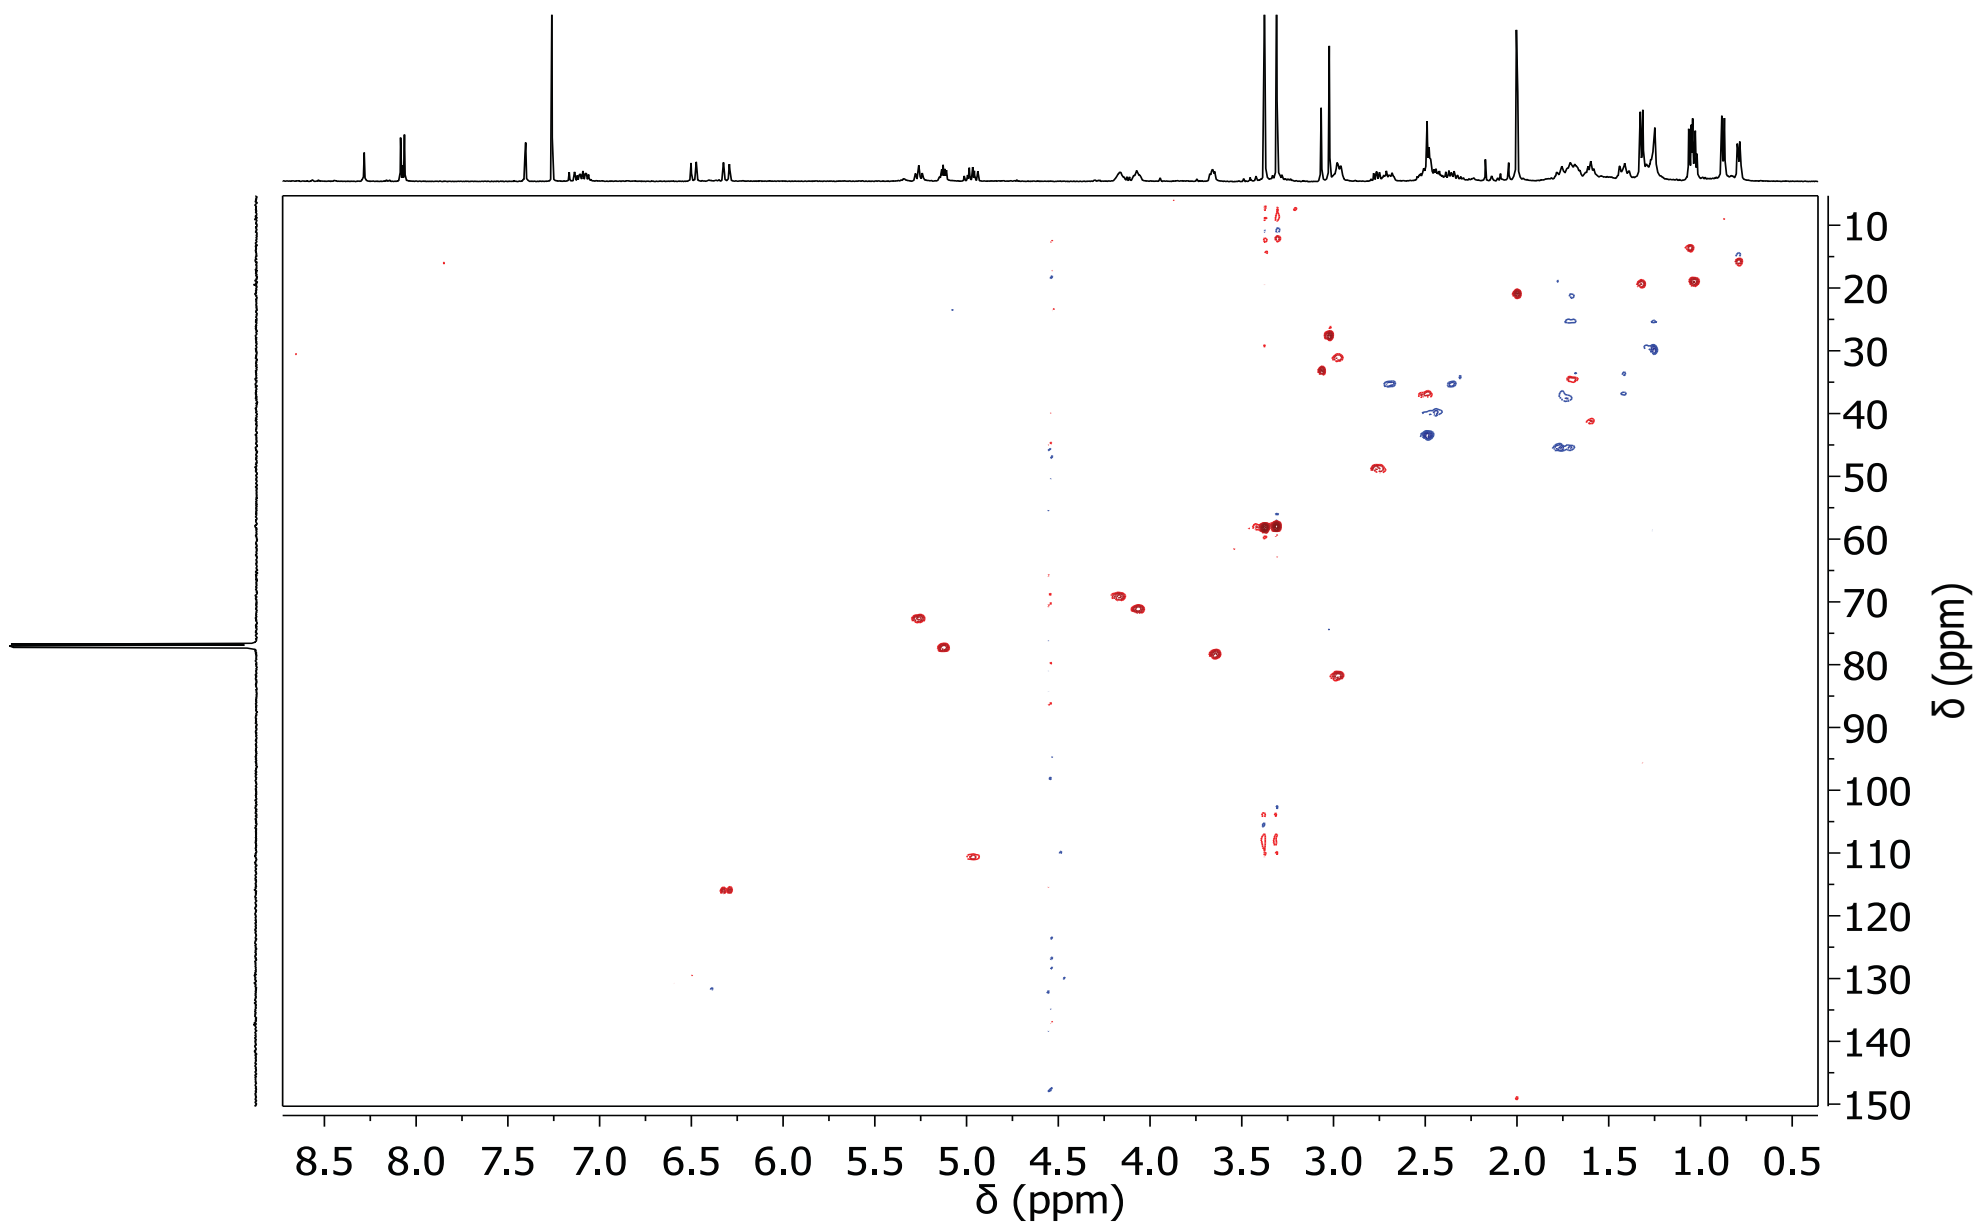

Figure S9. gCOSY Spectrum of Ulapualide D (4) (CDCl<sub>3</sub>, 500 MHz)

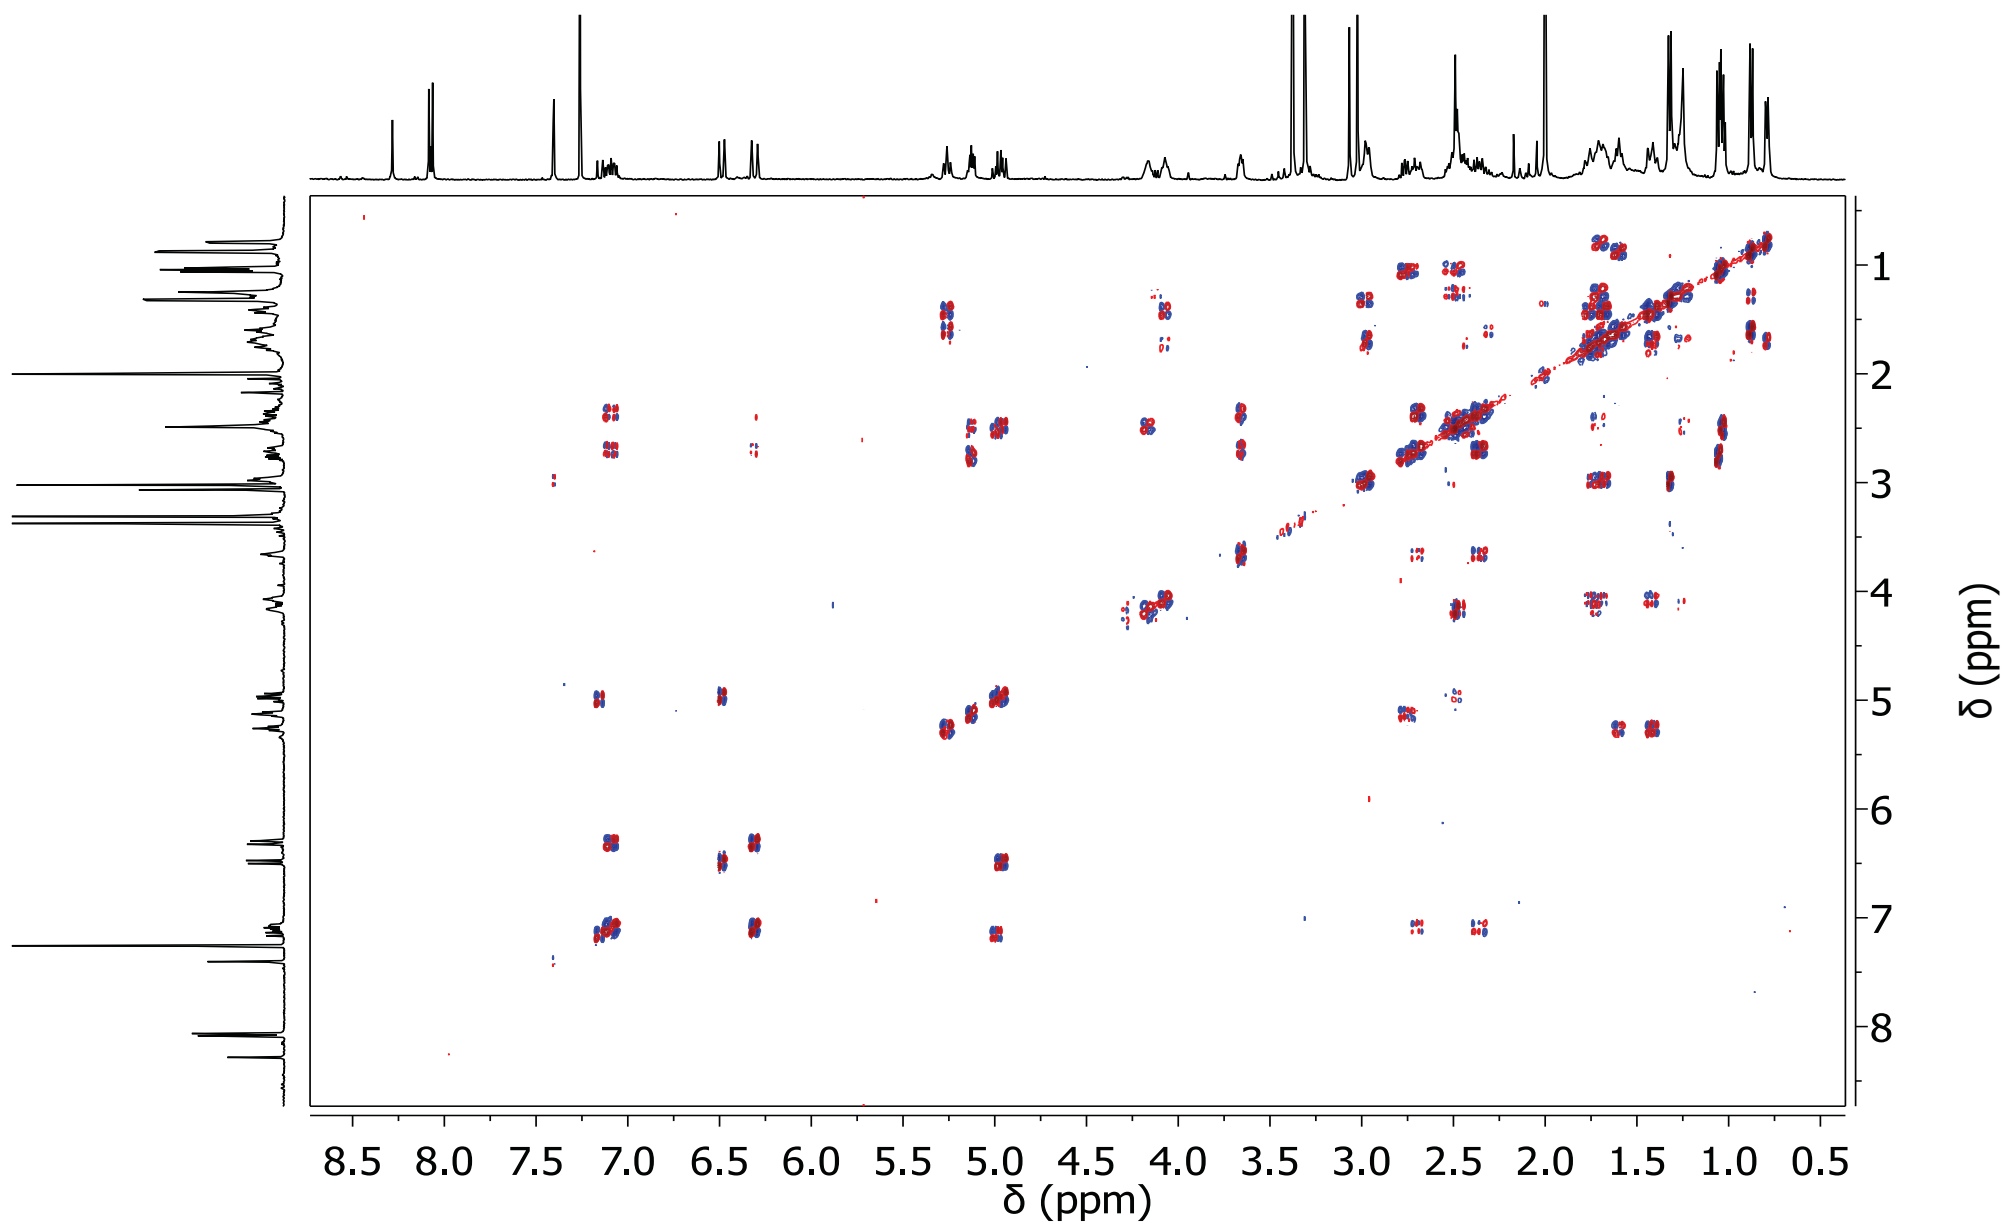

Figure S10. HMBC Spectrum of Ulapualide D (4) (CDCl<sub>3</sub>, 500 MHz)

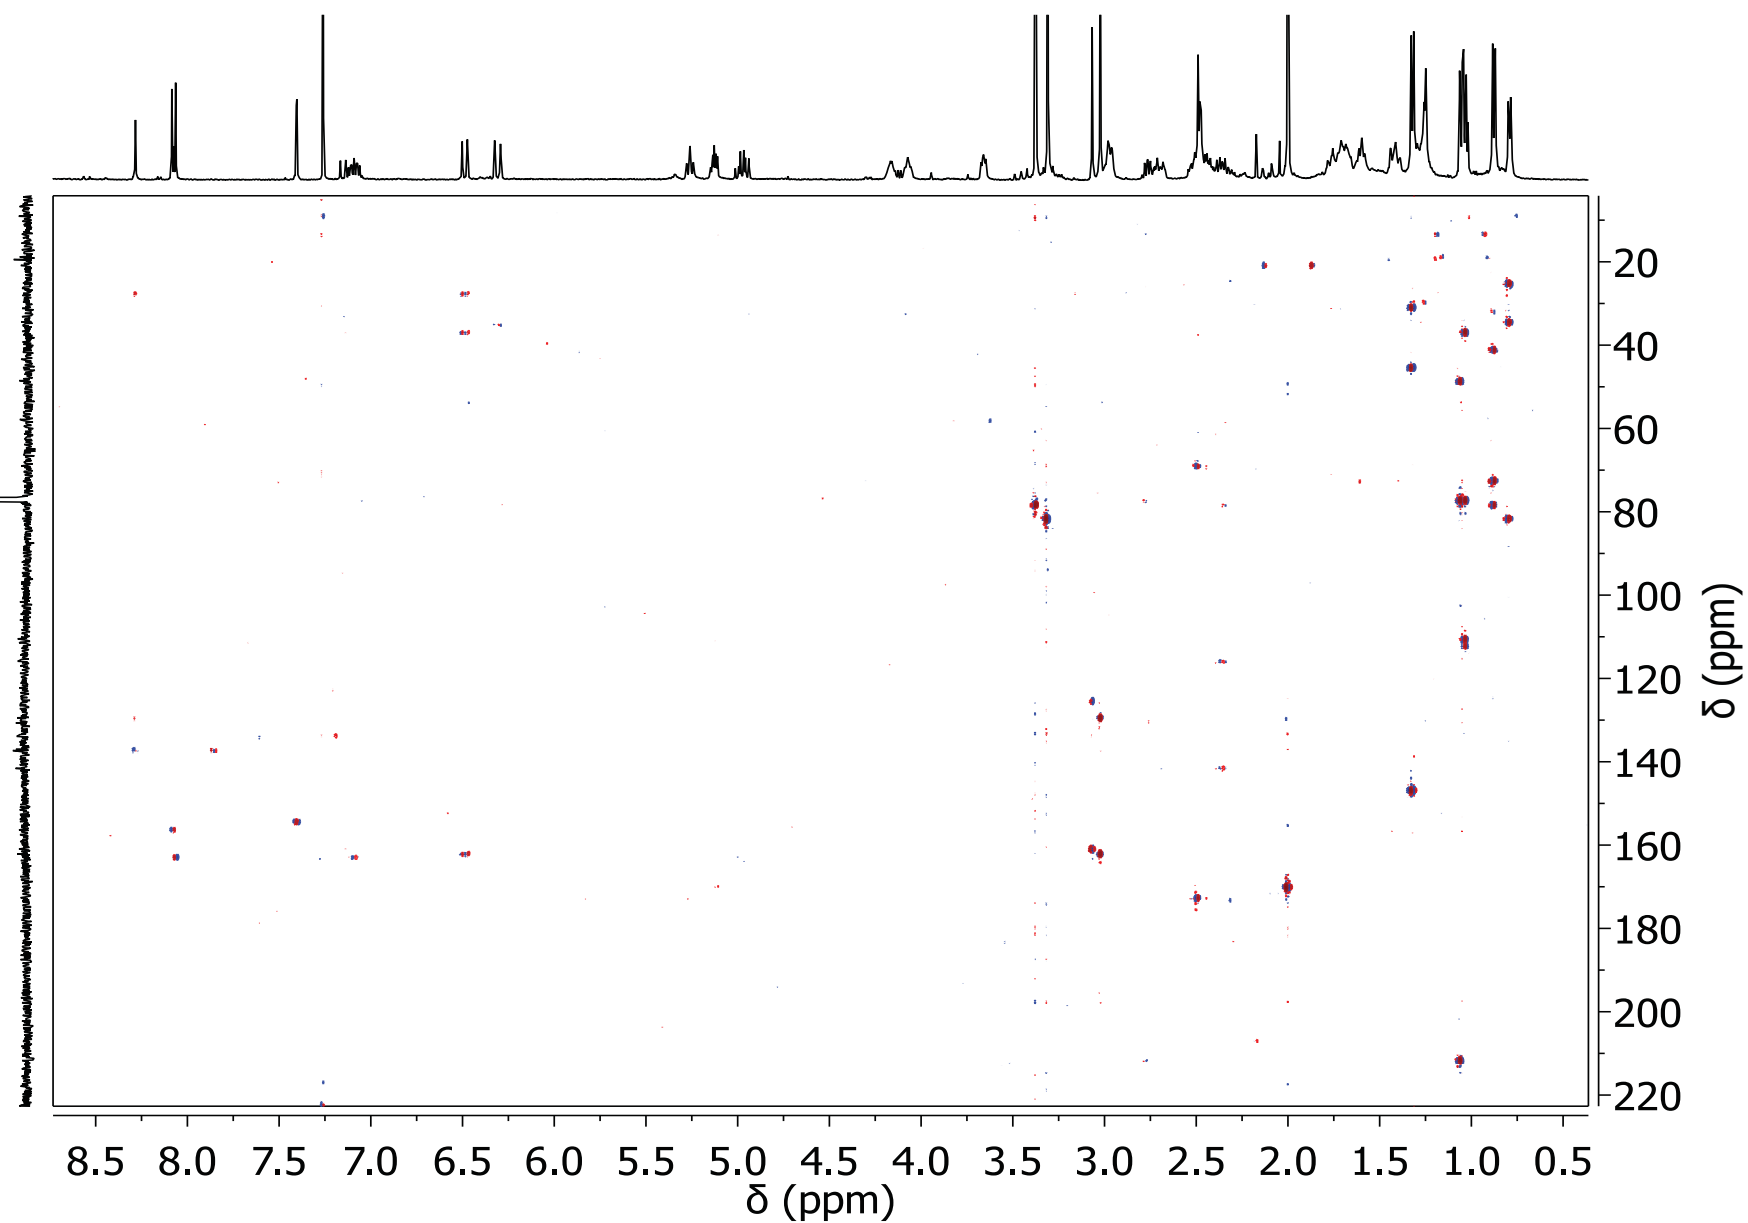

Figure S11. <sup>1</sup>H NMR Spectrum of Ulapualide E (5) (CDCl<sub>3</sub>, 500 MHz)

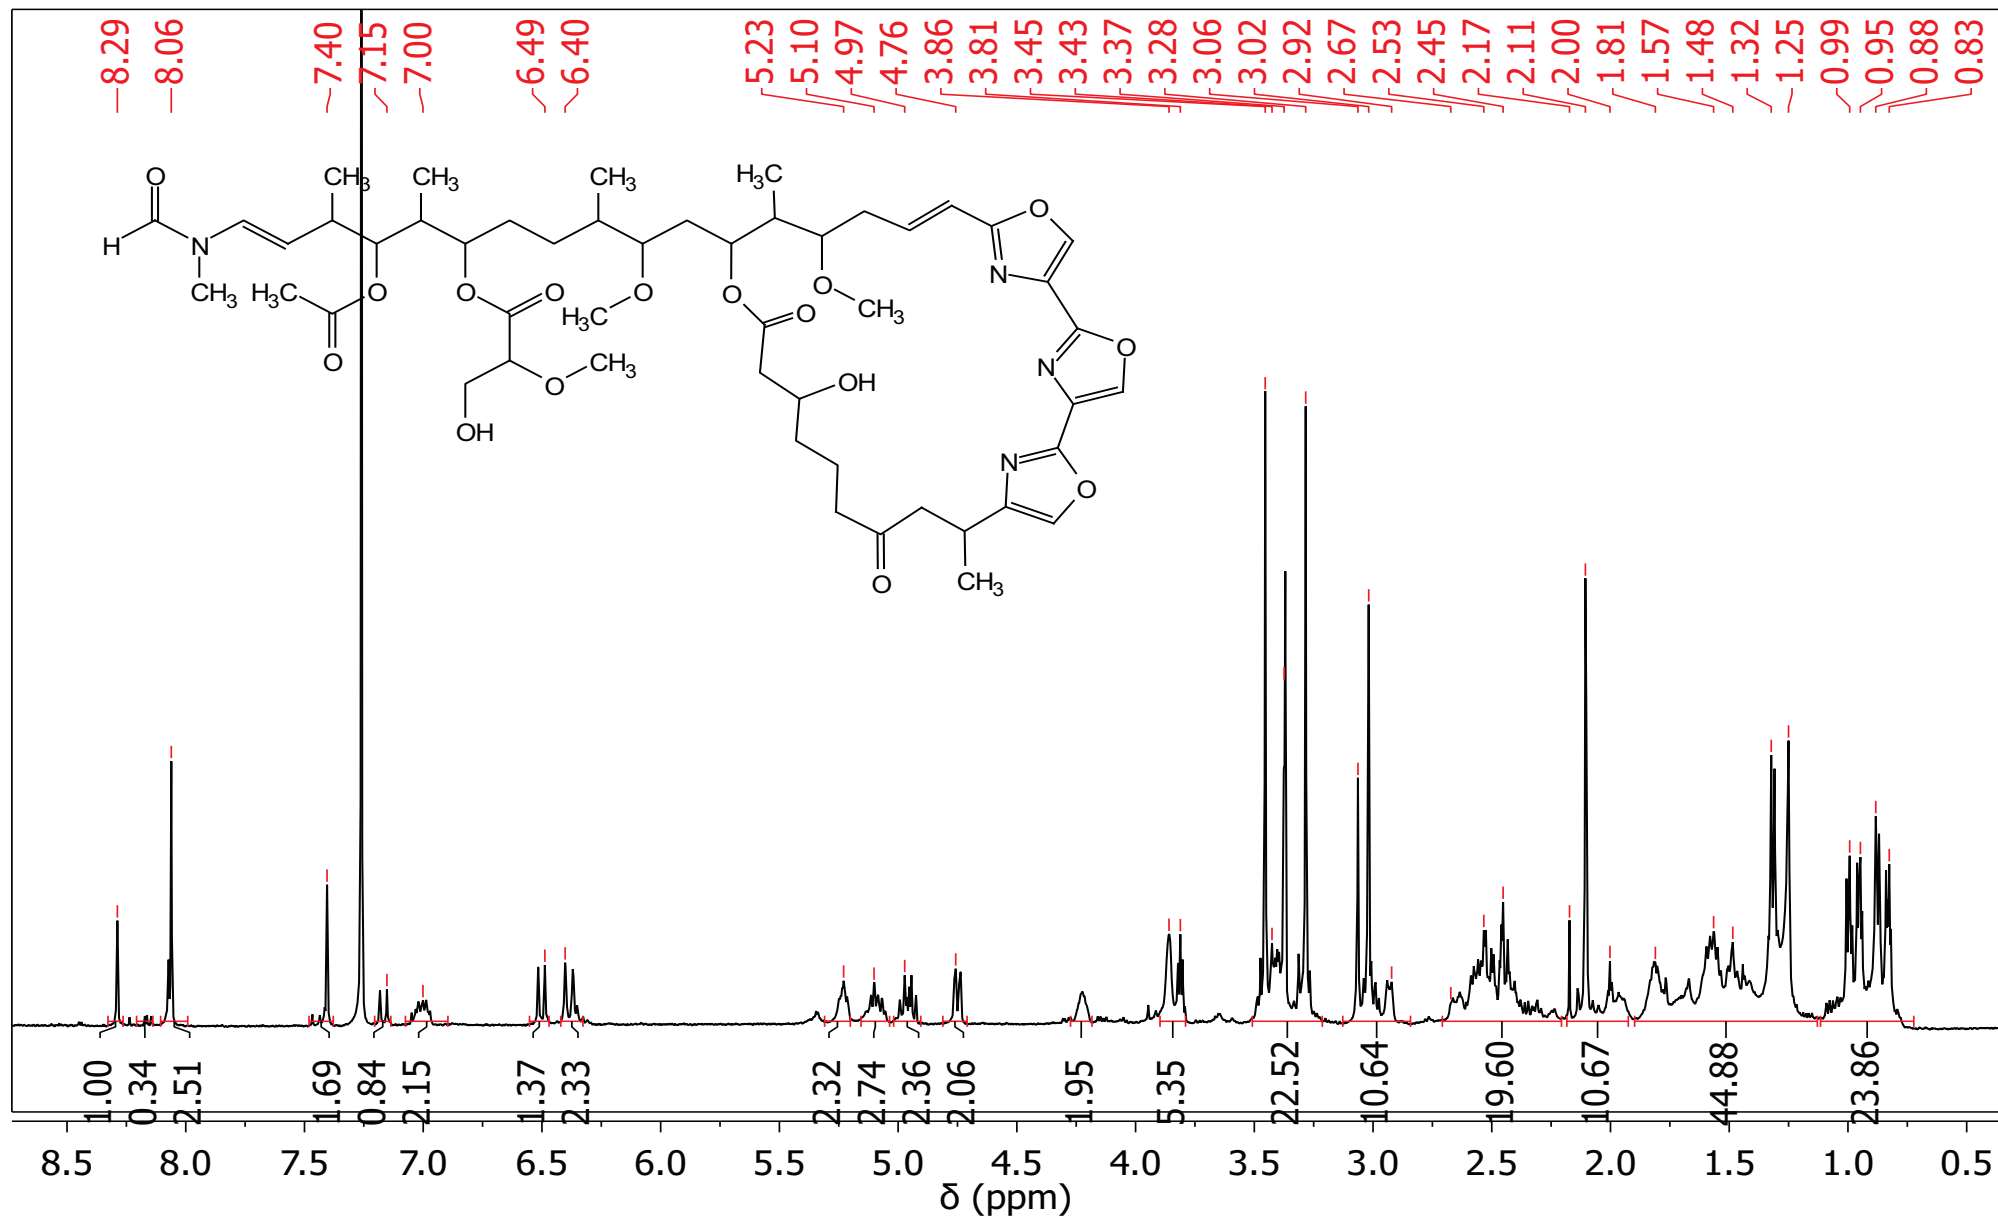

Figure S12.  $^{13}\text{C}$  NMR Spectrum of Ulapualide E (5) ( $\text{CDCl}_3$ , 125 MHz)

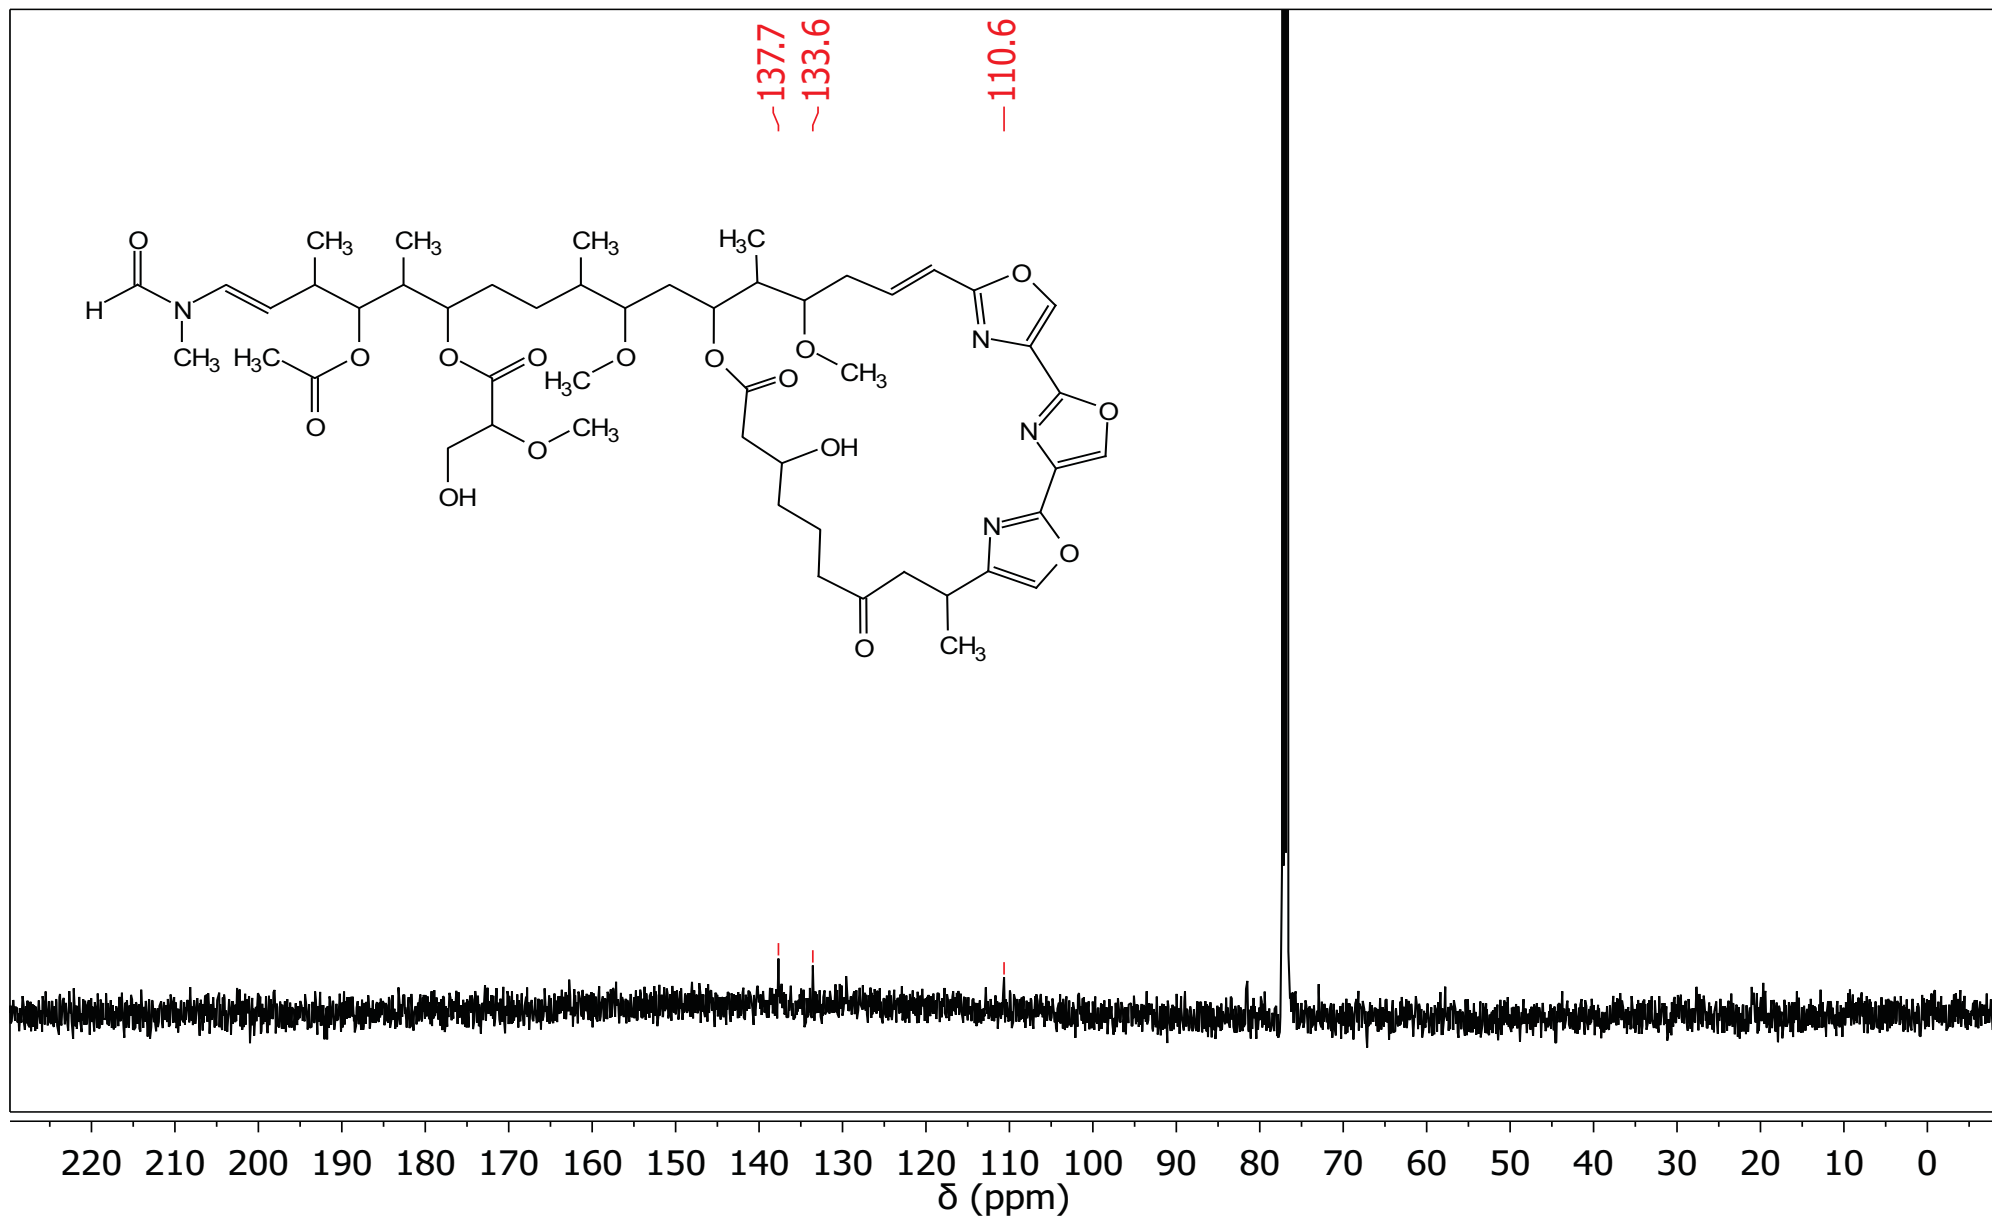

Figure S13. gHSQC Spectrum of Ulapualide E (5) (CDCl<sub>3</sub>, 500 MHz)

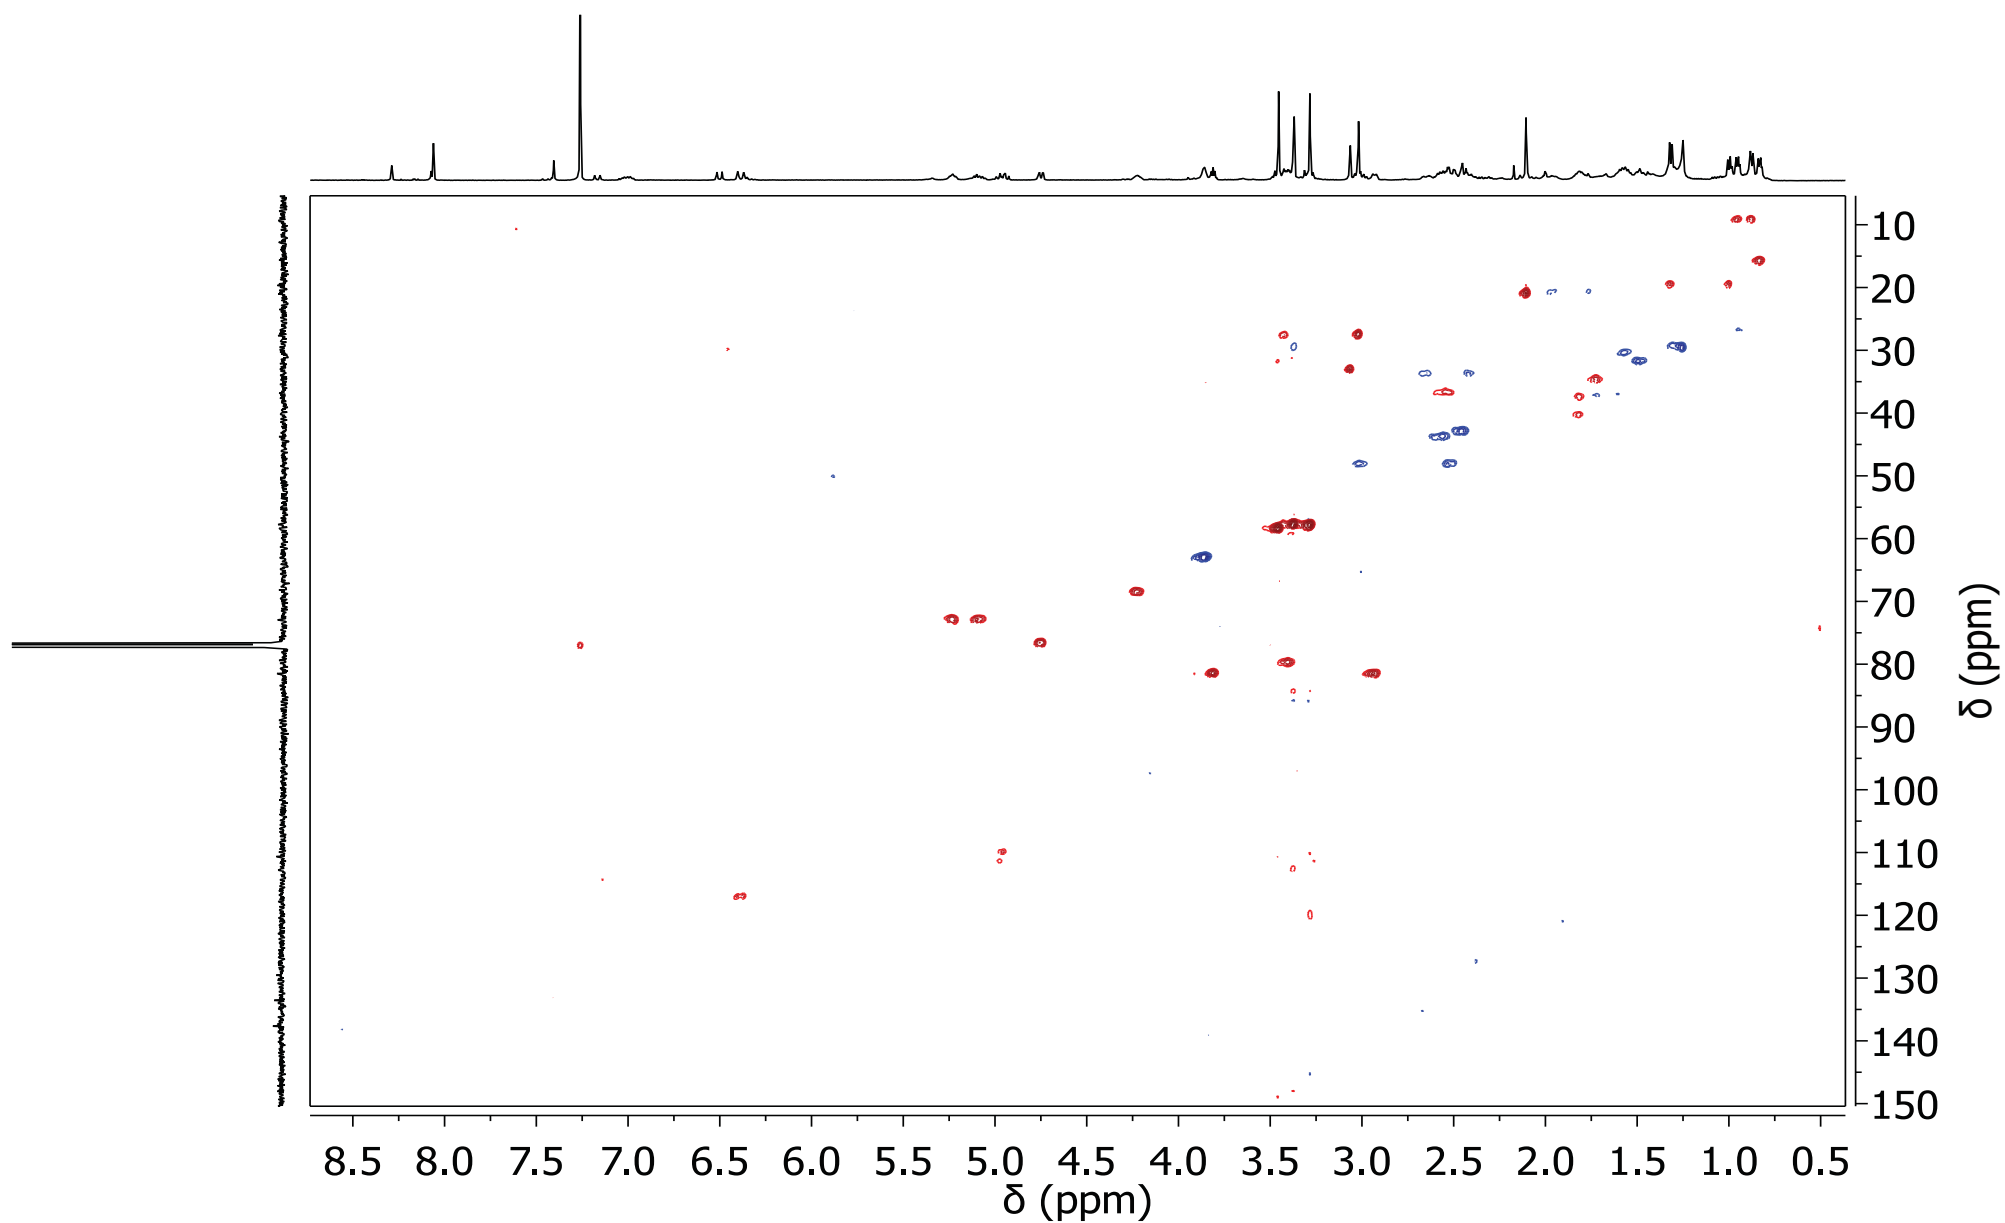

Figure S14. gCOSY Spectrum of Ulapualide E (5) (CDCl<sub>3</sub>, 500 MHz)

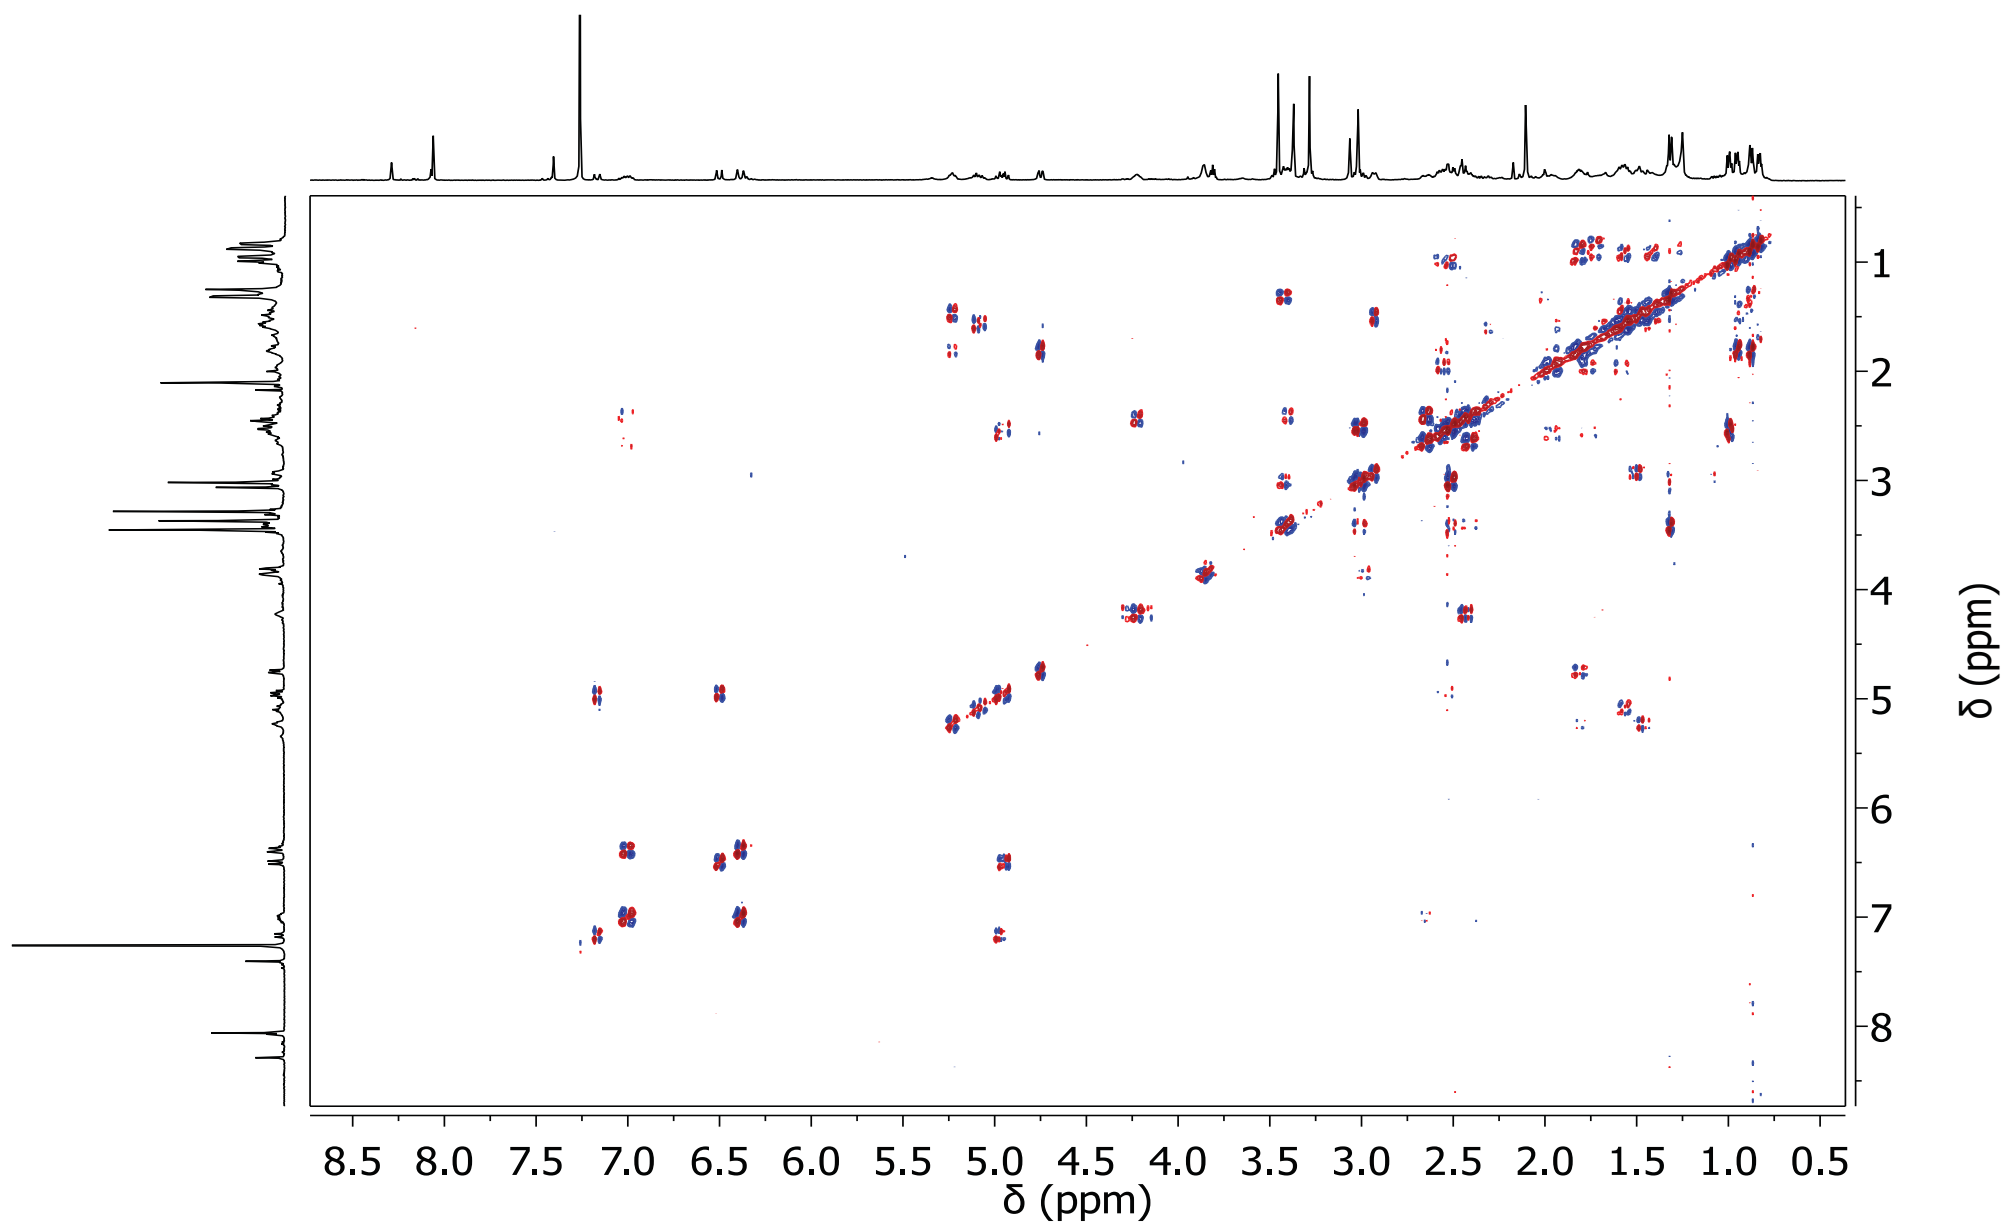



Figure S15. HMBC Spectrum of Ulapualide E (5) (CDCl<sub>3</sub>, 500 MHz)

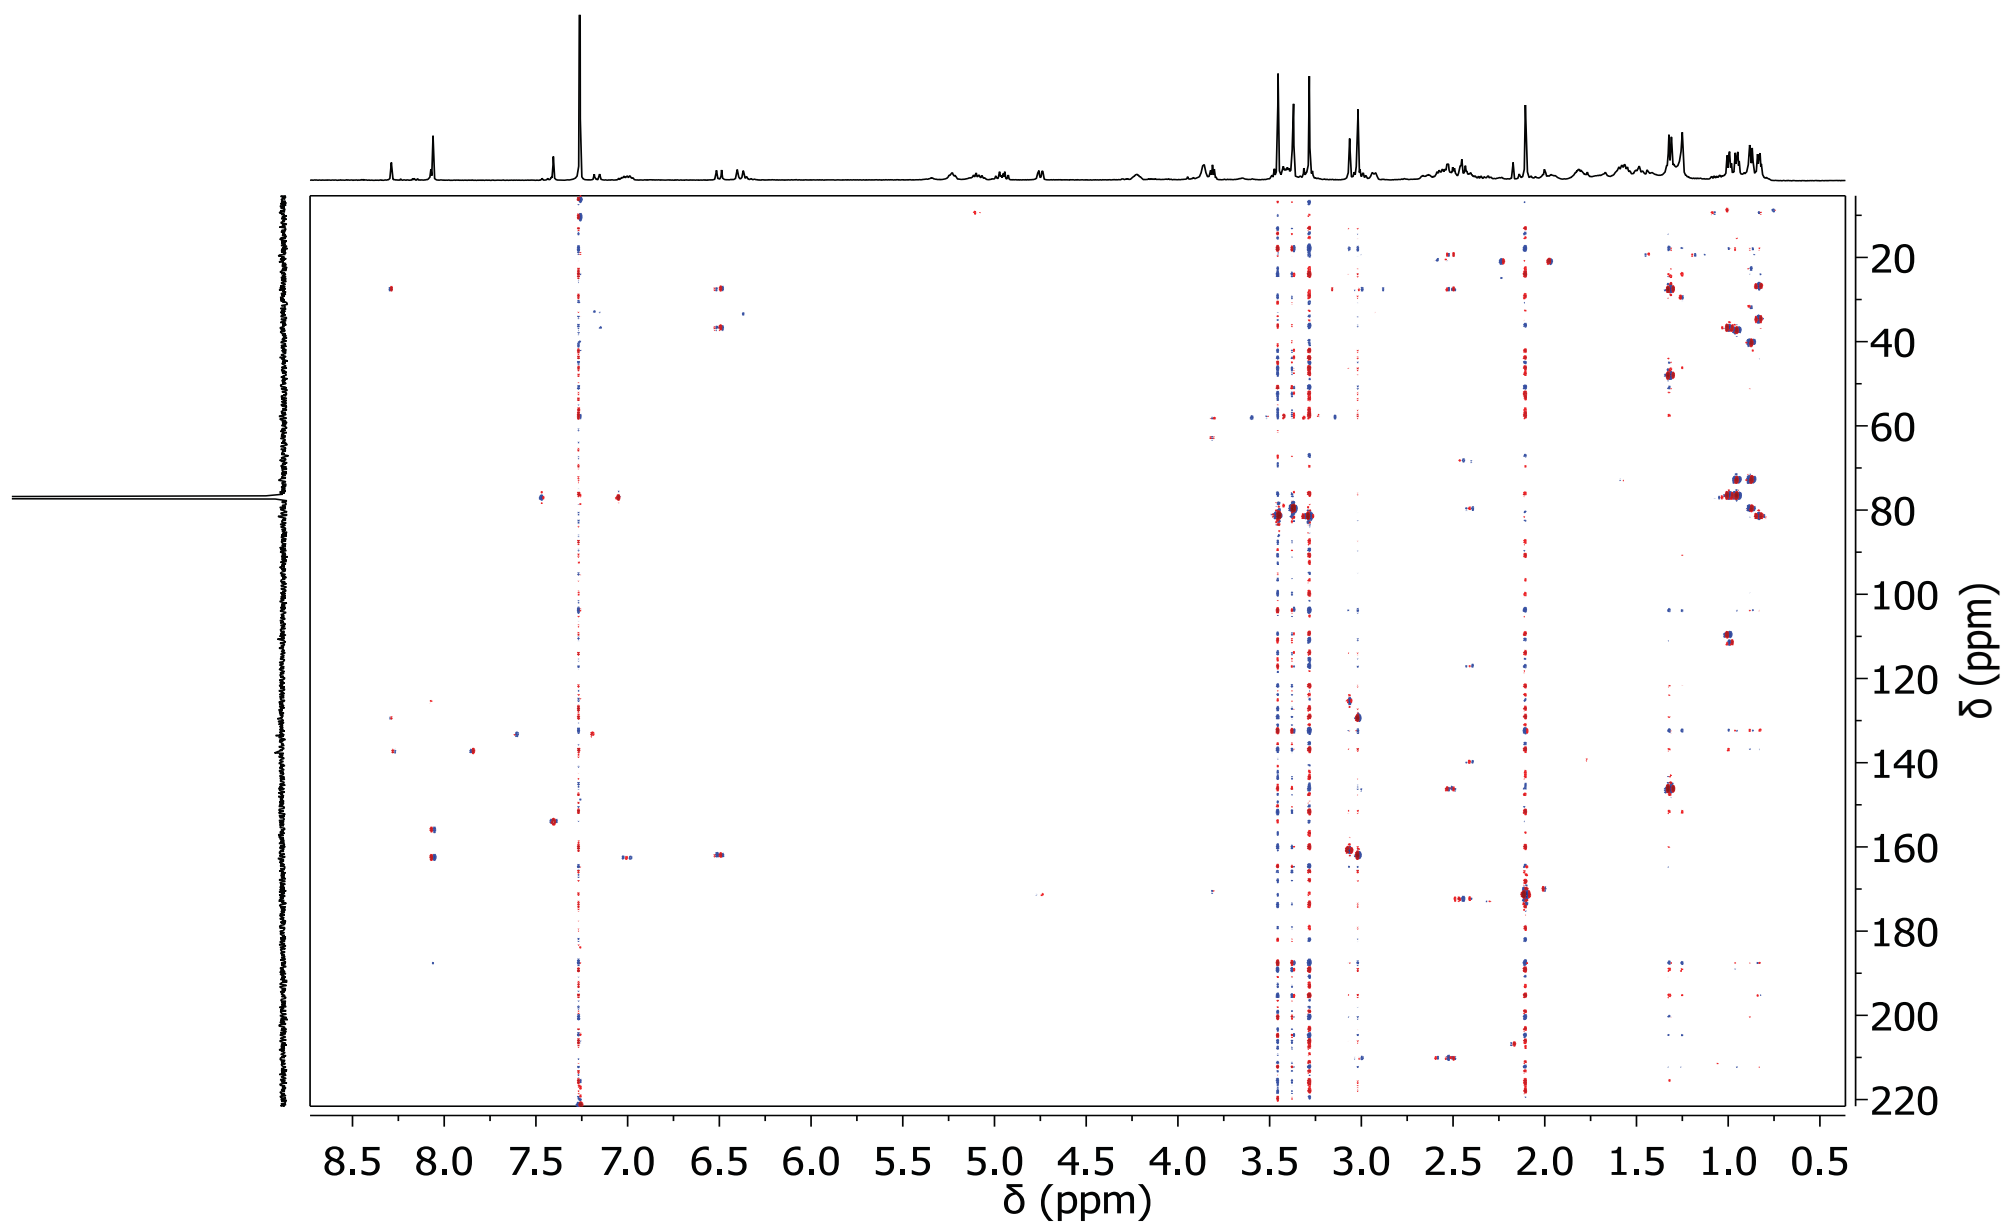

Figure S16. <sup>1</sup>H NMR Spectrum of Ulapualide A (1) (CDCl<sub>3</sub>, 500 MHz)

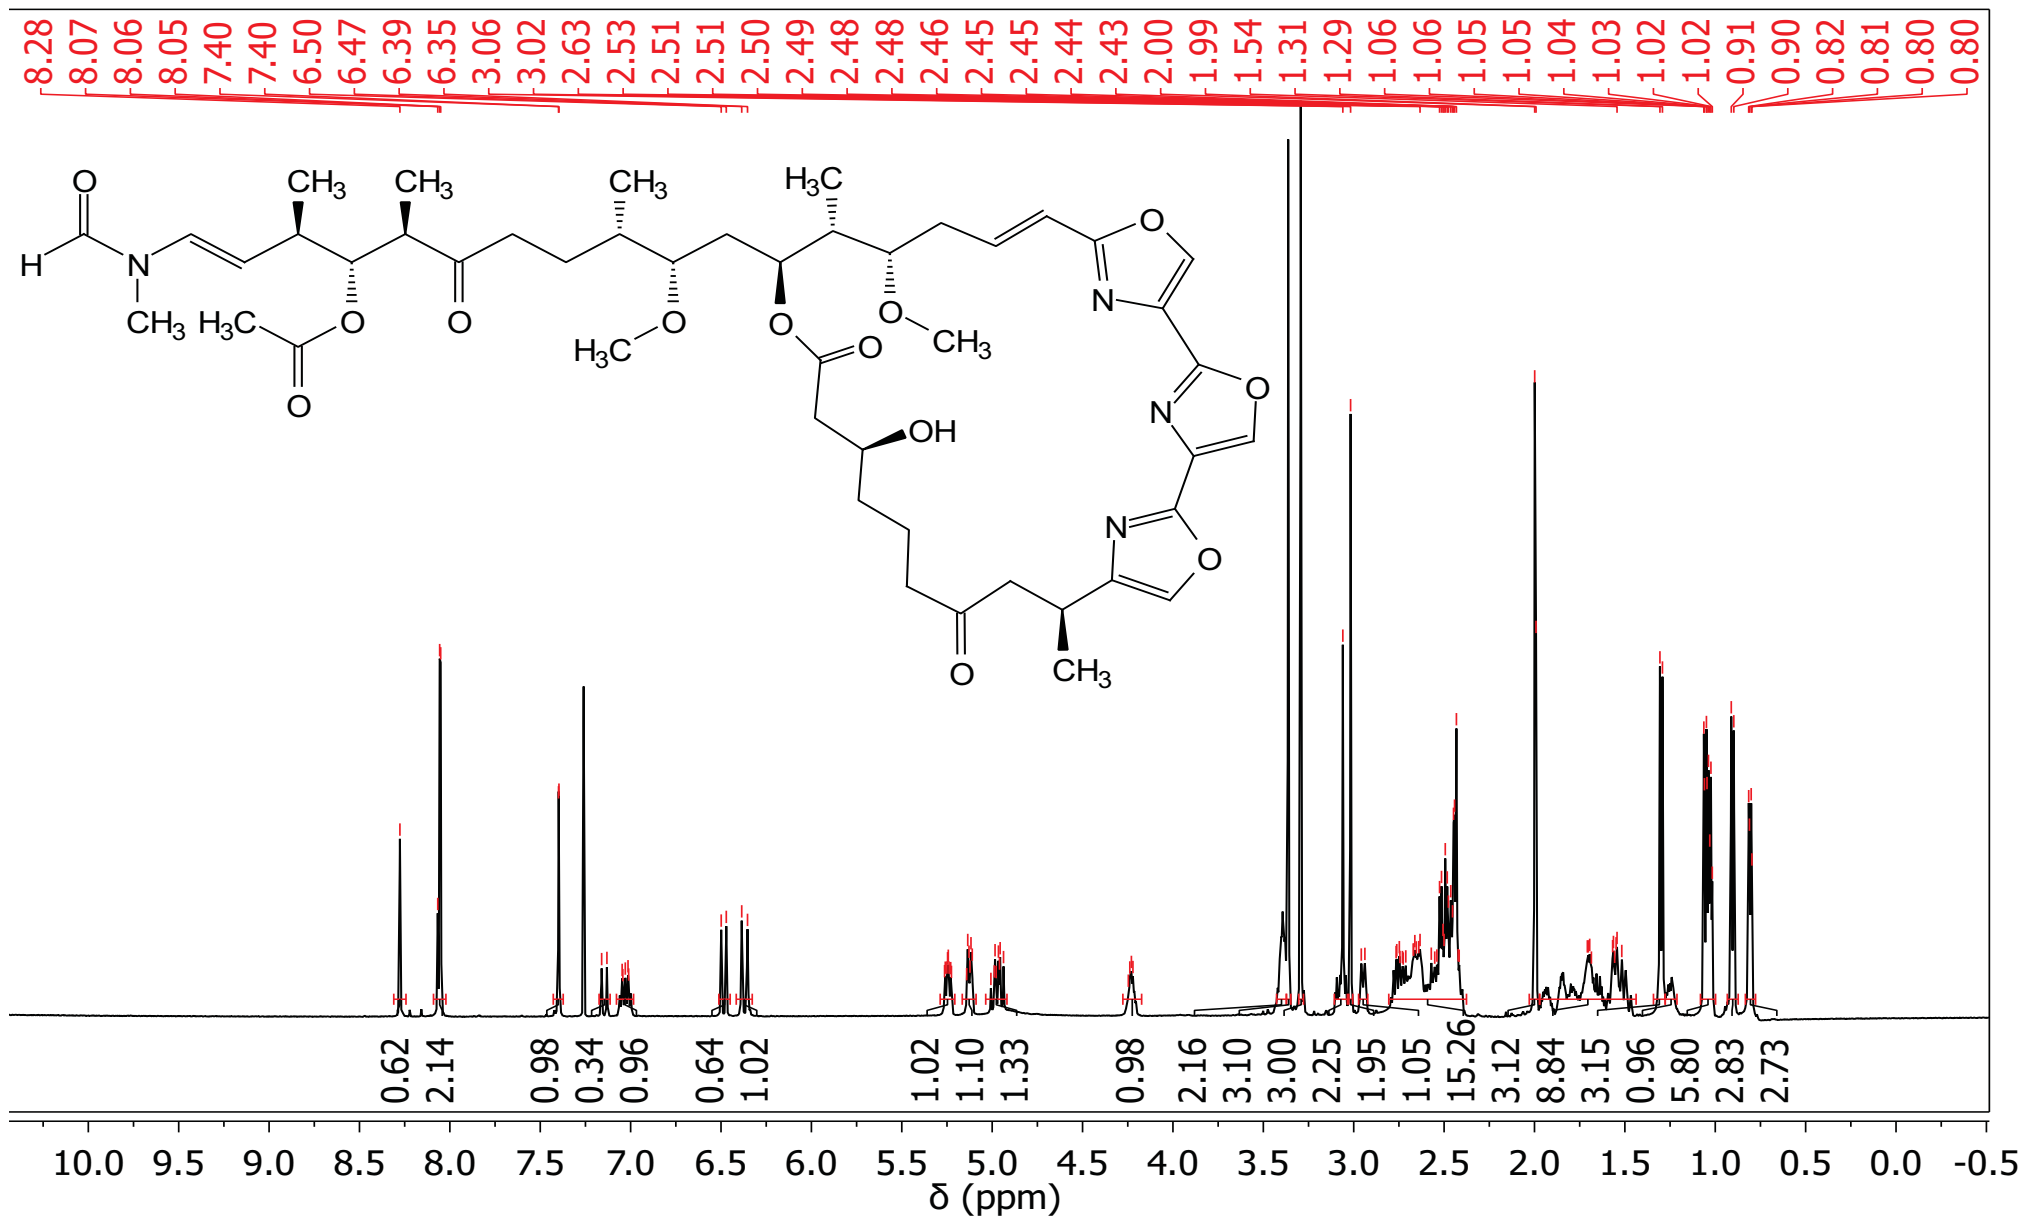

Figure S17. <sup>13</sup>C NMR Spectrum of Ulapualide A (1) (CDCl<sub>3</sub>, 125 MHz)

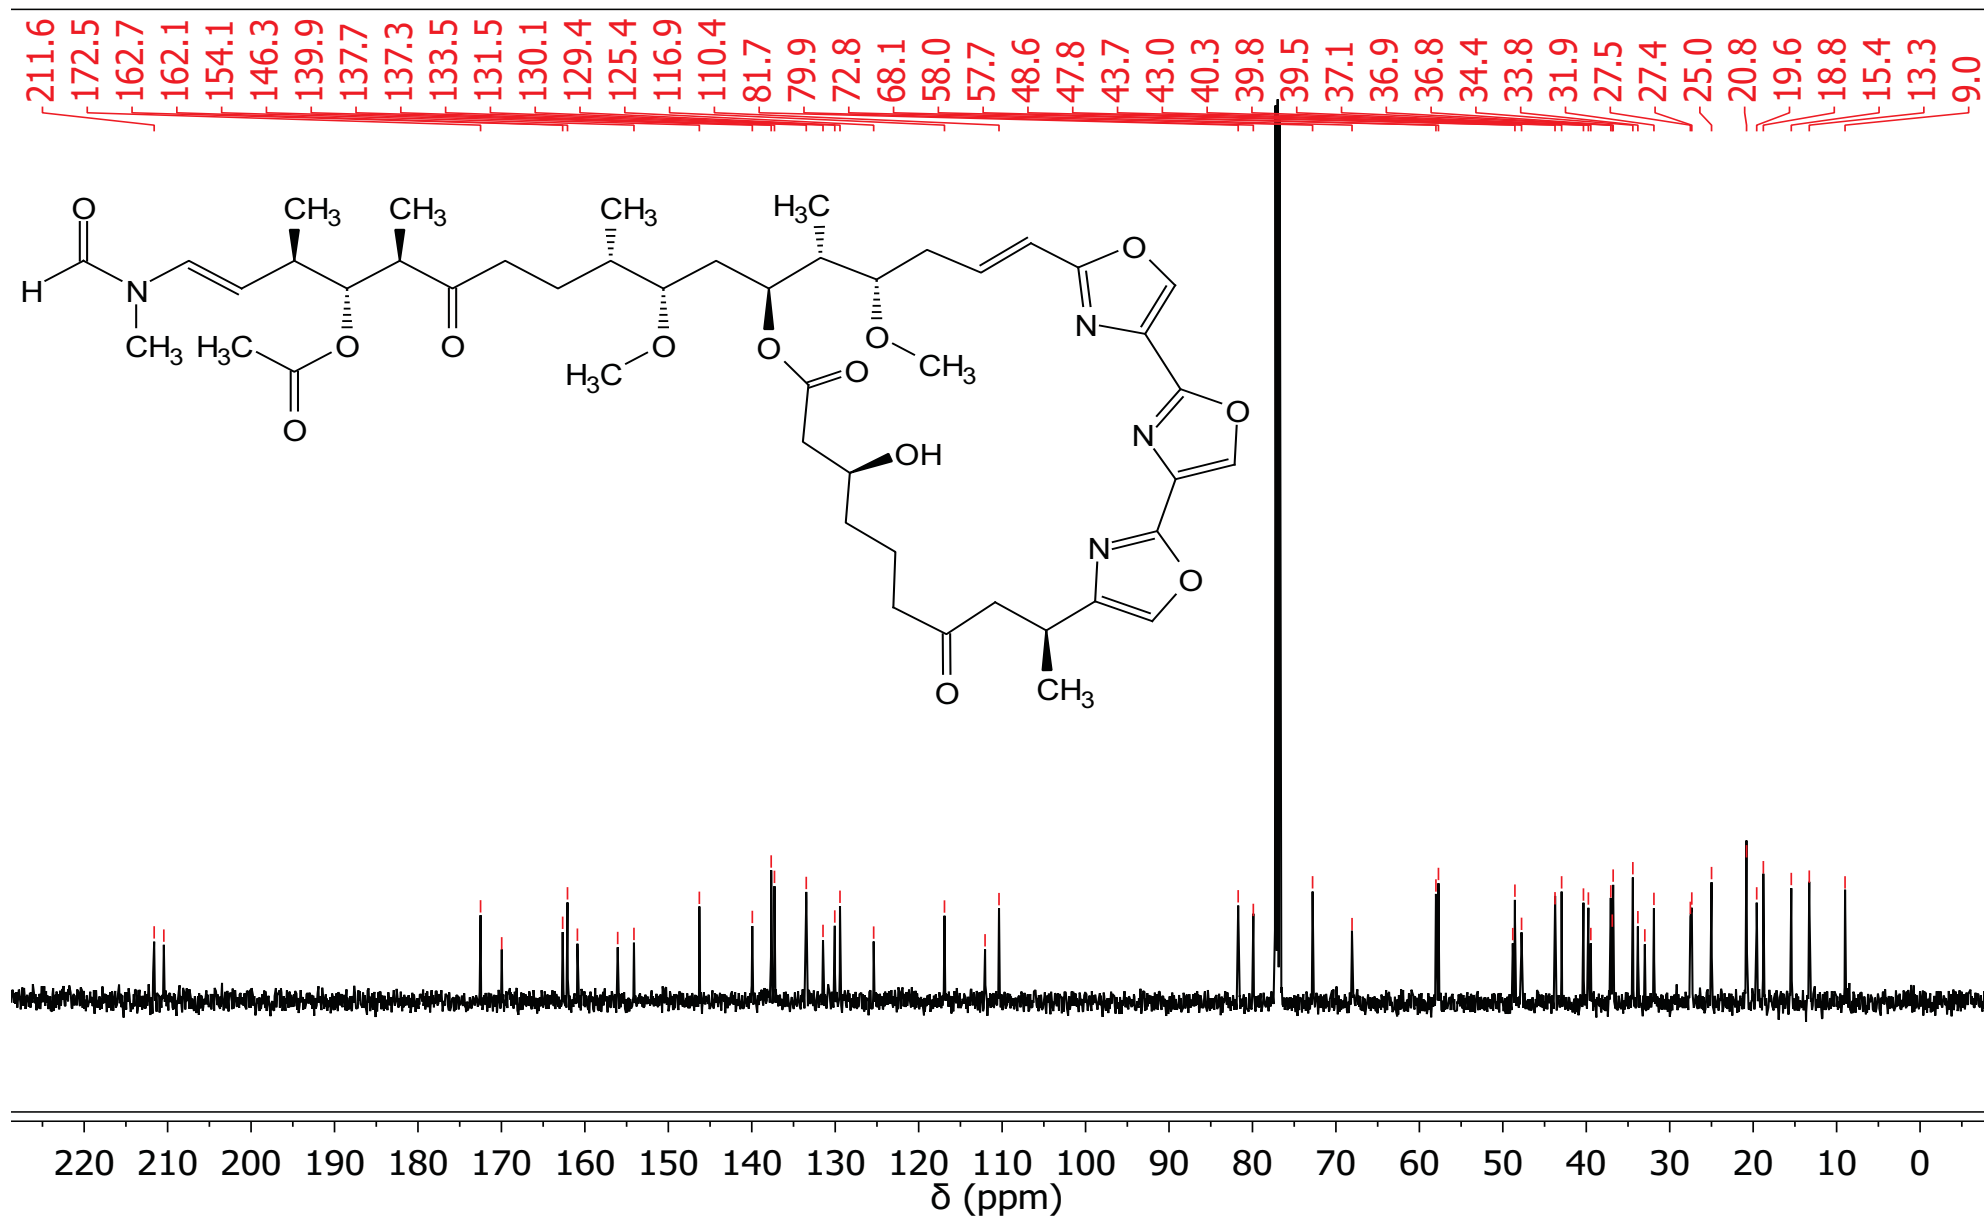

Figure S18. <sup>1</sup>H NMR Spectrum of Ulapualide B (2) (CDCl<sub>3</sub>, 500 MHz)

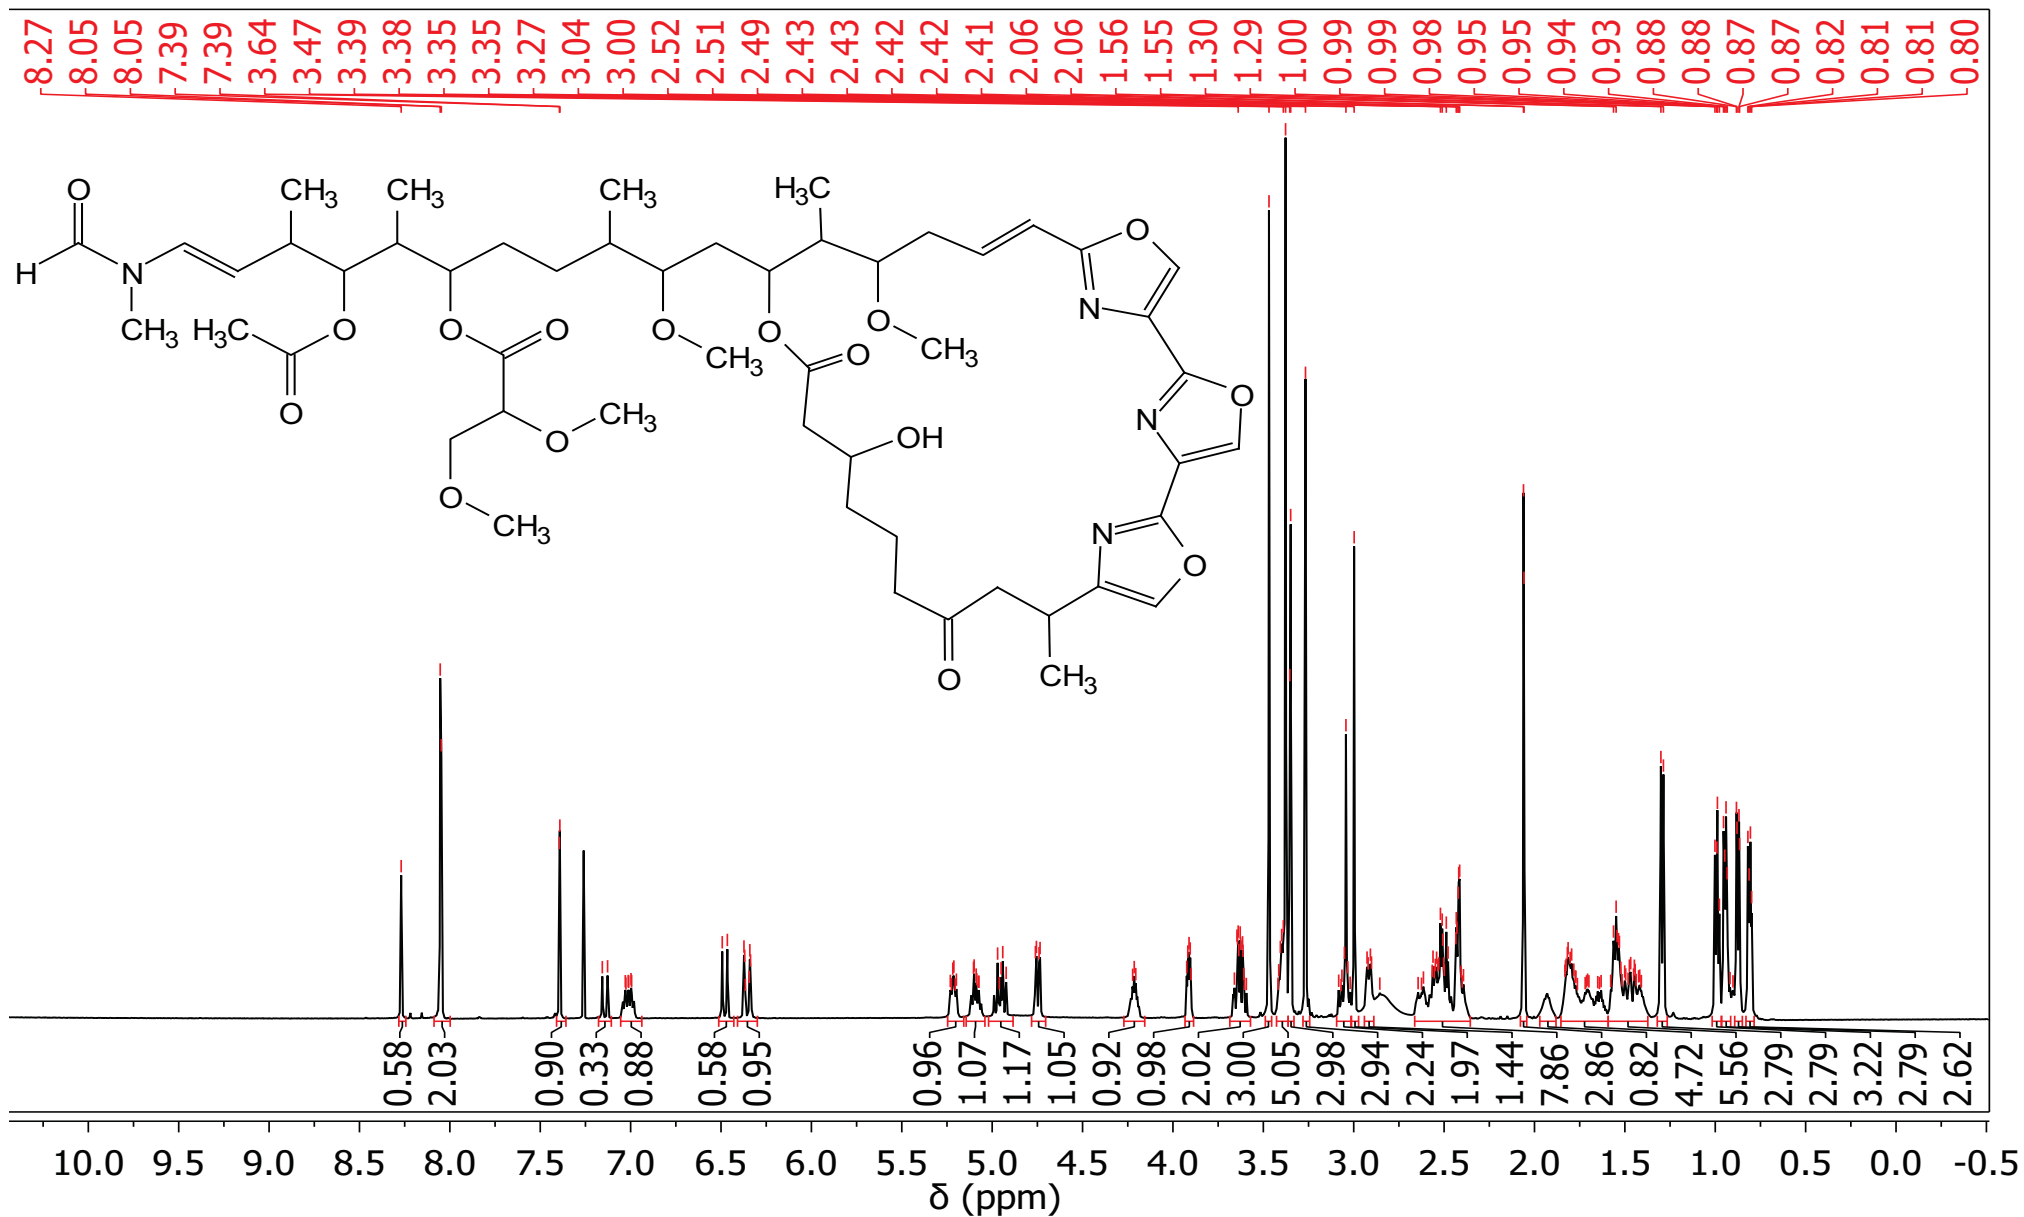

Figure S19. <sup>13</sup>C NMR Spectrum of Ulapualide B (2) (CDCl<sub>3</sub>, 125 MHz)

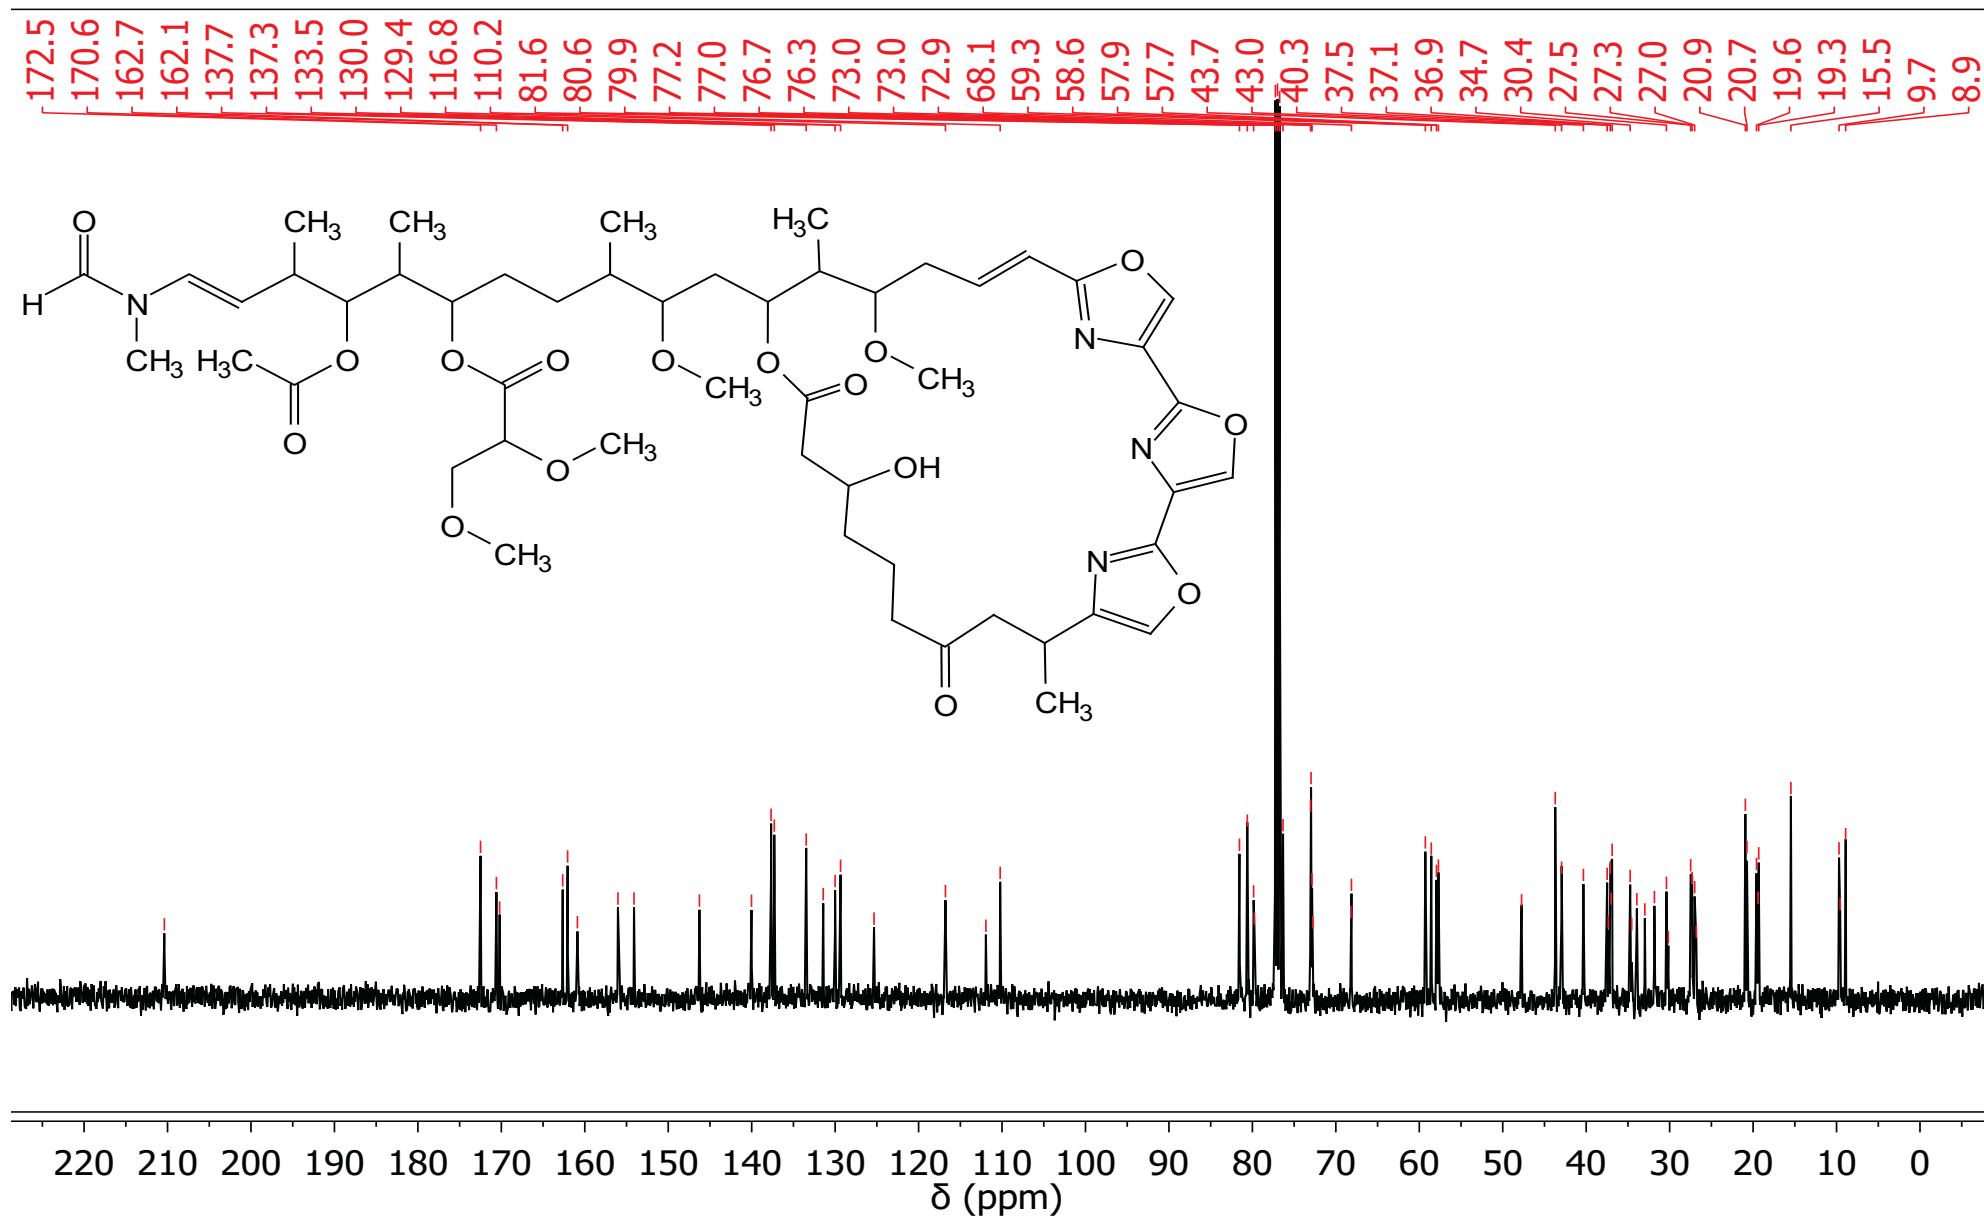

Figure S20. IC<sub>50</sub> Curves for Ulapualides A-C Against Select Cell Lines

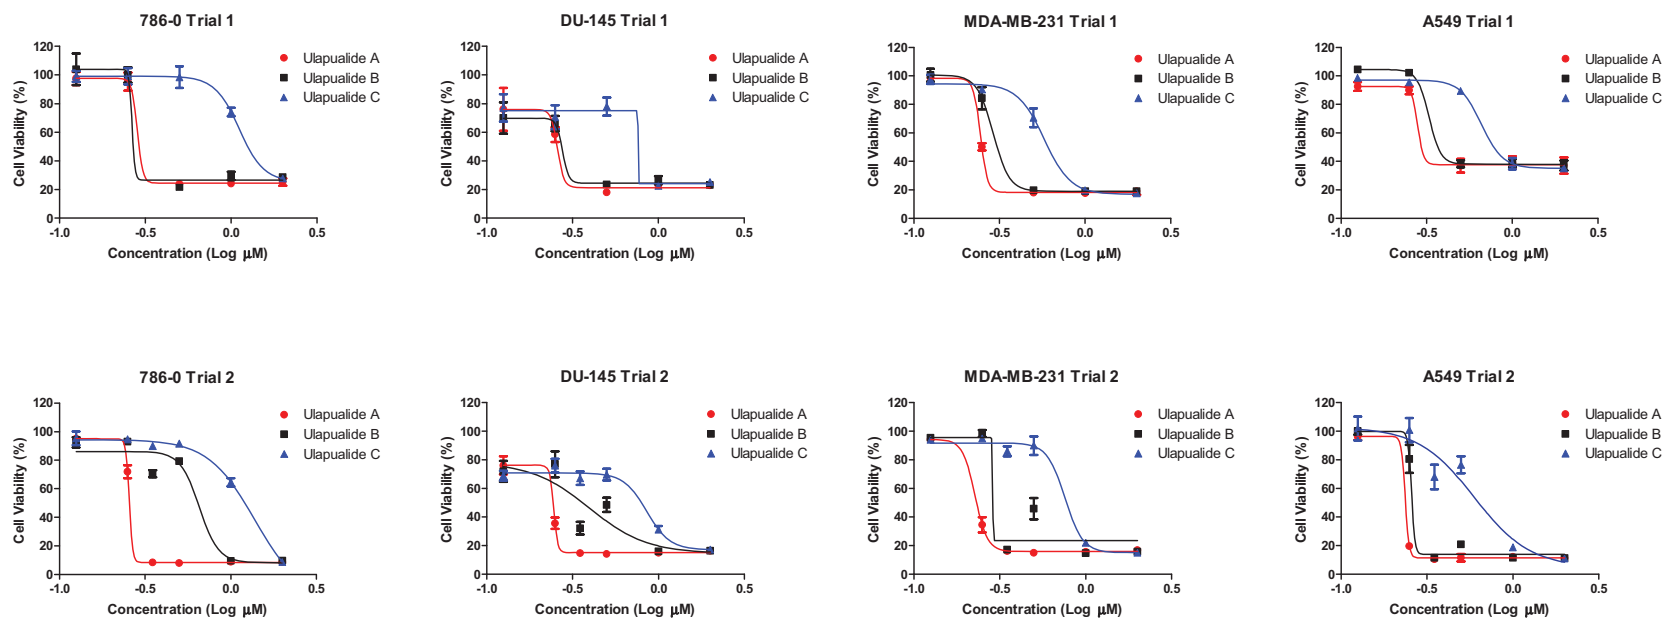

**Figure S21. Image of *Hexabranhus sanguineus* Egg Mass**

Collected approximately 20 ft deep at Electric Beach, O'ahu (21°21'14.3"N 158°07'49.7"W).

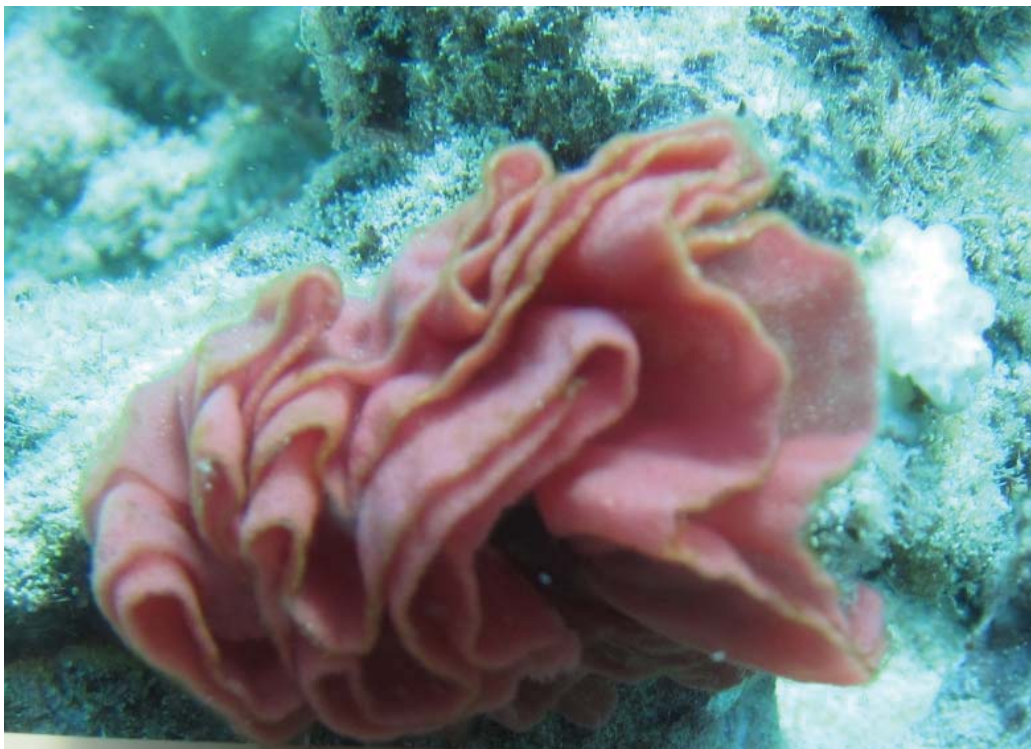

## Assay Protocols: BACE1

**BACE1 Assay:** The proteolytic cleavage of amyloid precursor protein was assayed as described by Naqvi.<sup>1</sup> Test compounds were solubilized in DMSO at the desired concentration and incubated in triplicate with the enzyme for 16 h in 96-well plates. A DMSO control (1.5  $\mu$ L) and an inhibitor standard (Calbiochem  $\beta$ -secretase inhibitor IV,  $IC_{50}$  = 11 nM) were also tested in triplicate. The chemiluminescence signal was read using a Fluorostar Optima spectrophotometer.

(1) Naqvi, T. J. *Biomol. Screen.* **2004**, 9, 298–408.
